# Supplementary material
Source: ML conference proceedings conference paper supplement (https://proceedings.neurips.cc/paper_files/paper/2019/hash/a9986cb066812f440bc2bb6e3c13696c-Abstract.html)
Supplement: Supplementary file [file a9986cb066812f440bc2bb6e3c13696c-Supplemental.zip]

---

# Acceleration via Symplectic Discretization of High-Resolution Differential Equations

---

Anonymous Author(s)

Affiliation

Address

email

## Abstract

We study first-order optimization algorithms obtained by discretizing ordinary differential equations (ODEs) corresponding to Nesterov’s accelerated gradient methods (NAGs) and Polyak’s heavy-ball method. We consider three discretization schemes: symplectic Euler (**S**), explicit Euler (**E**) and implicit Euler (**I**) schemes. We show that the optimization algorithm generated by applying the symplectic scheme to a high-resolution ODE proposed by Shi et al. [2018] achieves the accelerated rate for minimizing both strongly convex functions and convex functions. On the other hand, the resulting algorithm either fails to achieve acceleration or is impractical when the scheme is implicit, the ODE is low-resolution, or the scheme is explicit.

## 1 Introduction

In this paper, we consider unconstrained minimization problems:

$$\min_{x \in \mathbb{R}^n} f(x), \quad (1.1)$$

where  $f$  is a smooth convex function. The touchstone method in this setting is gradient descent (GD):

$$x_{k+1} = x_k - s \nabla f(x_k), \quad (1.2)$$

where  $x_0$  is a given initial point and  $s > 0$  is the step size. Whether there exist methods that improve on GD while remaining within the framework of first-order optimization is a subtle and important question.

Modern attempts to address this question date to Polyak [1964, 1987], who incorporated a momentum term into the gradient step, yielding a method that is referred to as the *heavy-ball method*:

$$y_{k+1} = x_k - s \nabla f(x_k), \quad x_{k+1} = y_{k+1} - \alpha(x_k - x_{k-1}), \quad (1.3)$$

where  $\alpha > 0$  is a momentum coefficient. While the heavy-ball method provably attains a faster rate of *local* convergence than GD near a minimum of  $f$ , it generally does not provide a guarantee of acceleration *globally* [Polyak, 1964].

The next major development in first-order methods is due to Nesterov, who introduced first-order gradient methods that have a faster *global* convergence rate than GD [Nesterov, 1983, 2013]. For a  $\mu$ -strongly convex objective  $f$  with  $L$ -Lipschitz gradients, Nesterov’s *accelerated gradient method* (NAG-SC) involves the following pair of update equations:

$$y_{k+1} = x_k - s \nabla f(x_k), \quad x_{k+1} = y_{k+1} + \frac{1 - \sqrt{\mu s}}{1 + \sqrt{\mu s}} (y_{k+1} - y_k). \quad (1.4)$$

26 If one sets  $s = 1/L$ , then NAG-SC enjoys a  $O\left((1 - \sqrt{\mu/L})^k\right)$  convergence rate, improving on  
 27 the  $O\left((1 - \mu/L)^k\right)$  convergence rate of GD. Nesterov also developed an accelerated algorithm  
 28 (NAG-C) targeting smooth convex functions that are not strongly convex:

$$y_{k+1} = x_k - s\nabla f(x_k), \quad x_{k+1} = y_{k+1} + \frac{k}{k+3}(y_{k+1} - y_k). \quad (1.5)$$

29 This algorithm has a  $O(L/k^2)$  convergence rate, which is faster than GD's  $O(L/k)$  rate.

30 While yielding optimal and effective algorithms, the design principle of Nesterov's accelerated  
 31 gradient algorithms (NAG) is not transparent. Convergence proofs for NAG often use the *estimate*  
 32 *sequence* technique, which is inductive in nature and relies on series of algebraic tricks [Bubeck,  
 33 2015]. In recent years progress has been made in the understanding of acceleration by moving to a  
 34 *continuous-time* formulation. In particular, Su et al. [2016] showed that as  $s \rightarrow 0$ , NAG-C converges  
 35 to an ordinary differential equation (ODE) (Equation (2.2)); moreover, for this ODE, Su et al. [2016]  
 36 derived a (continuous-time) convergence rate using a Lyapunov function, and further transformed  
 37 this Lyapunov function to a discrete version and thereby provided a new proof of the fact that  
 38 NAG-C enjoys a  $O(L/k^2)$  rate.

39 Further progress in this vein has involved taking a variational point of view that derives ODEs from  
 40 an underlying Lagrangian rather than from a limiting argument [Wibisono et al., 2016]. While this  
 41 approach captures many of the variations of Nesterov acceleration presented in the literature, it does  
 42 not distinguish between the heavy-ball dynamics and the NAG dynamics, and thus fails to distinguish  
 43 between local and global acceleration. More recently, Shi et al. [2018] have returned to limiting  
 44 arguments with a more sophisticated methodology. They have derived *high-resolution* ODEs for the  
 45 heavy-ball method (Equation (2.4)), NAG-SC (Equation (2.5)) and NAG-C (Equation (2.6)). Notably,  
 46 the high-resolution ODEs for the heavy-ball dynamics and the accelerated dynamics are different.  
 47 Shi et al. [2018] also presented Lyapunov functions for these ODEs as well as the corresponding  
 48 algorithms, and showed that these Lyapunov functions can be used to derive the accelerated rates  
 49 of NAG-SC and NAG-C. A number of other papers have also contributed to the understanding of  
 50 acceleration by working in a continuous-time formulation [Krichene and Bartlett, 2017, Krichene  
 51 et al., 2015, Diakonikolas and Orecchia, 2017, Ghadimi and Lan, 2016, Diakonikolas and Orecchia,  
 52 2017].

53 This emerging literature has thus provided a new level of understanding of design principles for  
 54 accelerated optimization. The design involves an interplay between continuous-time and discrete-time  
 55 dynamics. ODEs are obtained either variationally or via a limiting scheme, and various properties of  
 56 the ODEs are studied, including their convergence rate, topological aspects of their flow and their  
 57 behavior under perturbation. Lyapunov functions play a key role in such analyses, and also allow  
 58 aspects of the continuous-time analysis to be transferred to discrete time [see, e.g., Wilson et al.,  
 59 2016].

60 And yet the literature has not yet provided a full exploration of the transition from continuous-time  
 61 ODEs to discrete-time algorithms. Indeed, this transition is a non-trivial one, as evidenced by the  
 62 decades of research on numerical methods for the discretization of ODEs, including most notably the  
 63 sophisticated arsenal of techniques referred to as “geometric numerical integration” that are used for  
 64 ODEs obtained from underlying variational principles [Hairer et al., 2006]. Recent work has begun  
 65 to explore these issues; examples include the use of symplectic integrators by Betancourt et al. [2018]  
 66 and the use of Runge-Kutta integration by Zhang et al. [2018]. However, these methods do not  
 67 always yield proofs that accelerated rates are retained in discrete time, and when they do they involve  
 68 implicit discretization, which is generally not practical except in the setting of quadratic objectives.

69 Thus we wish to address the following fundamental question:

70 *Can we systematically and provably obtain new accelerated methods via the numerical discretization*  
 71 *of ordinary differential equations?*

72 Our approach to this question is a dynamical systems framework based on Lyapunov theory. Our  
 73 main results are as follows:

74 1. In Section 3.1, we consider three simple numerical discretization schemes—symplectic Euler  
 75 (S), explicit Euler (E) and implicit Euler (I) schemes—to discretize the high-resolution ODE of

76 Nesterov’s accelerated method for strongly convex functions. We show that the optimization  
 77 method generated by symplectic discretization achieves a  $O((1 - O(1)\sqrt{\mu/L})^k)$  rate, thereby  
 78 attaining acceleration. In sharp contrast, the implicit scheme is not practical for implementation,  
 79 and the explicit scheme, while being simple, fails to achieve acceleration.

80 2. In Section 3.2, we apply these discretization schemes to the ODE for modeling the heavy-ball  
 81 method, which can be viewed as a low-resolution ODE that lacks a gradient-correction term [Shi  
 82 et al., 2018]. In contrast to the previous two cases of high-resolution ODEs, the symplectic scheme  
 83 does not achieve acceleration for this low-resolution ODE. More broadly, in Appendix D we  
 84 present more examples of low-resolution ODEs where symplectic discretization does *not* lead to  
 85 acceleration.

86 3. Next, we apply the three simple Euler schemes to the high-resolution ODE of Nesterov’s acceler-  
 87 ated method for convex functions. Again, our Lyapunov analysis sheds light on the superiority of  
 88 the symplectic scheme over the other two schemes. This is the subject of Section 4.

89 Taken together, the three findings have the implication that *high-resolution* ODEs and *symplectic*  
 90 schemes are critical to achieving acceleration using numerical discretization. More precisely, in  
 91 addition to allowing relatively simple implementations, symplectic schemes allow for a large step size  
 92 without a loss of stability, in a manner akin to (but better than) implicit schemes. In stark contrast,  
 93 in the setting of low-resolution ODEs, only the implicit schemes remain stable with a large step  
 94 size, due to the lack of gradient correction. Moreover, the choice of Lyapunov function is equally  
 95 essential to obtaining sharp convergence rates. This important fact is highlighted in Theorem A.6 in  
 96 the Appendix, where we analyze GD by considering it as a discretization method for gradient flow  
 97 (the ODE counterpart of GD). Using the discrete version of the Lyapunov function proposed in Su  
 98 et al. [2016] instead of the classical one, we show that GD in fact minimizes the squared gradient  
 99 norm (choosing the best iterate so far) at a rate of  $O(L^2/k^2)$ . Although this rate of convergence in  
 100 the problem of squared gradient norm minimization is known in the literature [Nesterov, 2012], the  
 101 Lyapunov function argument provides a systematic approach to obtaining this rate in this problem and  
 102 others. In particular, this example demonstrates the usefulness and flexibility of Lyapunov functions  
 103 as a mathematical tool for optimization problems.

## 104 2 Preliminaries

105 In this section, we introduce necessary notation, and review ODEs derived in previous work and three  
 106 classical numerical discretization schemes.

107 We mostly follow the notation of Nesterov [2013], with slight modifications tailored to the present  
 108 paper. Let  $\mathcal{F}_L^1(\mathbb{R}^n)$  be the class of  $L$ -smooth convex functions defined on  $\mathbb{R}^n$ ; that is,  $f \in \mathcal{F}_L^1(\mathbb{R}^n)$  if  
 109  $f(y) \geq f(x) + \langle \nabla f(x), y - x \rangle$  for all  $x, y \in \mathbb{R}^n$  and its gradient is  $L$ -Lipschitz continuous in the  
 110 sense that

$$\|\nabla f(x) - \nabla f(y)\| \leq L \|x - y\|,$$

111 where  $\|\cdot\|$  denotes the standard Euclidean norm and  $L > 0$  is the Lipschitz constant. The function class  
 112  $\mathcal{F}_L^2(\mathbb{R}^n)$  is the subclass of  $\mathcal{F}_L^1(\mathbb{R}^n)$  such that each  $f$  has a Lipschitz-continuous Hessian. For  $p = 1, 2$ ,  
 113 let  $\mathcal{S}_{\mu,L}^p(\mathbb{R}^n)$  denote the subclass of  $\mathcal{F}_L^p(\mathbb{R}^n)$  such that each member  $f$  is  $\mu$ -strongly convex for some  
 114  $0 < \mu \leq L$ . That is,  $f \in \mathcal{S}_{\mu,L}^p(\mathbb{R}^n)$  if  $f \in \mathcal{F}_L^p(\mathbb{R}^n)$  and  $f(y) \geq f(x) + \langle \nabla f(x), y - x \rangle + \frac{\mu}{2} \|y - x\|^2$   
 115 for all  $x, y \in \mathbb{R}^n$ . Let  $x^*$  denote a minimizer of  $f(x)$ .

### 116 2.1 Approximating ODEs

117 In this section we list all of the ODEs that we will discretize in this paper. We refer readers to recent  
 118 papers by Su et al. [2016], Wibisono et al. [2016] and Shi et al. [2018] for the rigorous derivations of  
 119 these ODEs. We begin with the simplest. Taking the step size  $s \rightarrow 0$  in Equation (1.2), we obtain the  
 120 following ODE (gradient flow):

$$\dot{X} = -\nabla f(X), \tag{2.1}$$

121 with any initial  $X(0) = x_0 \in \mathbb{R}^n$ .

122 Next, by taking  $s \rightarrow 0$  in Equation (1.5), Su et al. [2016] derived the low-resolution ODE of NAG-C:

$$\ddot{X} + \frac{3}{t} \dot{X} + \nabla f(X) = 0, \tag{2.2}$$

with  $X(0) = x_0$  and  $\dot{X}(0) = 0$ . For strongly convex functions, by taking  $s \rightarrow 0$ , one can derive the following low-resolution ODE (see, for example, Wibisono et al. [2016])

$$\ddot{X} + 2\sqrt{\mu}\dot{X} + \nabla f(X) = 0 \quad (2.3)$$

that models both the heavy-ball method and NAG-SC. This ODE has the same initial conditions as (2.2).

Recently, Shi et al. [2018] proposed high-resolution ODEs for modeling acceleration methods. The key ingredient in these ODEs is that the  $O(\sqrt{s})$  terms are preserved in the ODEs. As a result, the heavy-ball method and NAG-SC have different models as ODEs.

(a) If  $f \in \mathcal{S}_{\mu,L}^1(\mathbb{R}^n)$ , the high-resolution ODE of the heavy-ball method (1.3) is

$$\ddot{X} + 2\sqrt{\mu}\dot{X} + (1 + \sqrt{\mu s})\nabla f(X) = 0, \quad (2.4)$$

with  $X(0) = x_0$  and  $\dot{X}(0) = -\frac{2\sqrt{s}\nabla f(x_0)}{1+\sqrt{\mu s}}$ . This ODE has essentially the same properties as its low-resolution counterpart (2.3) due to the absence of  $\nabla^2 f(X)\dot{X}$ .

(b) If  $f \in \mathcal{S}_{\mu,L}^2(\mathbb{R}^n)$ , the high-resolution ODE of NAG-SC (1.4) is

$$\ddot{X} + 2\sqrt{\mu}\dot{X} + \sqrt{s}\nabla^2 f(X)\dot{X} + (1 + \sqrt{\mu s})\nabla f(X) = 0, \quad (2.5)$$

with  $X(0) = x_0$  and  $\dot{X}(0) = -\frac{2\sqrt{s}\nabla f(x_0)}{1+\sqrt{\mu s}}$ .

(c) If  $f \in \mathcal{F}_L^2(\mathbb{R}^n)$ , the high-resolution ODE of NAG-C (1.5) is

$$\ddot{X} + \frac{3}{t}\dot{X} + \sqrt{s}\nabla^2 f(X)\dot{X} + \left(1 + \frac{3\sqrt{s}}{2t}\right)\nabla f(X) = 0 \quad (2.6)$$

for  $t \geq 3\sqrt{s}/2$ , with  $X(3\sqrt{s}/2) = x_0$  and  $\dot{X}(3\sqrt{s}/2) = -\sqrt{s}\nabla f(x_0)$ .

## 2.2 Discretization schemes

To discretize ODEs (2.1)-(2.6), we replace  $\dot{X}$  by  $x_{k+1} - x_k$ ,  $\dot{V}$  by  $v_{k+1} - v_k$  and replace other terms with approximations. Different discretization schemes correspond to different approximations.

- The most straightforward scheme is the explicit scheme, which uses the following approximation rule:

$$x_{k+1} - x_k = \sqrt{s}v_k, \quad \sqrt{s}\nabla^2 f(x_k)v_k \approx \nabla f(x_{k+1}) - \nabla f(x_k).$$

- Another discretization scheme is the implicit scheme, which uses the following approximation rule:

$$x_{k+1} - x_k = \sqrt{s}v_{k+1}, \quad \sqrt{s}\nabla^2 f(x_{k+1})v_{k+1} \approx \nabla f(x_{k+1}) - \nabla f(x_k).$$

Note that compared with the explicit scheme, the implicit scheme is not practical because the update of  $x_{k+1}$  requires knowing  $v_{k+1}$  while the update of  $v_{k+1}$  requires knowing  $x_{k+1}$ .

- The last discretization scheme considered in this paper is the symplectic scheme, which uses the following approximation rule.

$$x_{k+1} - x_k = \sqrt{s}v_k, \quad \sqrt{s}\nabla^2 f(x_{k+1})v_k \approx \nabla f(x_{k+1}) - \nabla f(x_k).$$

Note this scheme is practical because the update of  $x_{k+1}$  only requires knowing  $v_k$ .

We remark that for low-resolution ODEs, there is no  $\nabla^2 f(x)$  term, whereas for high-resolution ODEs, we have this term and we use the difference of gradients to approximate this term. This additional approximation term is critical to acceleration.

## 3 High-Resolution ODEs for Strongly Convex Functions

This section considers numerical discretization of the high-resolution ODEs of NAG-SC and the heavy-ball method using the symplectic Euler, explicit Euler and implicit Euler scheme. In particular, we compare rates of convergence towards the objective minimum of the three simple Euler schemes and the two methods (NAG-SC and the heavy-ball method) in Section 3.1 and Section 3.2, respectively. For both cases, the associated symplectic scheme is shown to exhibit surprisingly similarity to the corresponding classical method.

### 159 3.1 NAG-SC

160 The high-resolution ODE (2.5) of NAG-SC can be equivalently written in the phase space as

$$\dot{X} = V, \quad \dot{V} = -2\sqrt{\mu}V - \sqrt{s}\nabla^2 f(X)V - (1 + \sqrt{\mu}s)\nabla f(X), \quad (3.1)$$

161 with the initial conditions  $X(0) = x_0$  and  $V(0) = -\frac{2\sqrt{s}\nabla f(x_0)}{1+\sqrt{\mu}s}$ . For any  $f \in \mathcal{S}_{\mu,L}^2(\mathbb{R}^n)$ , Theorem 1  
162 of Shi et al. [2018] shows that the solution  $X = X(t)$  of the ODE (2.5) satisfies

$$f(X) - f(x^*) \leq \frac{2\|x_0 - x^*\|^2}{s} e^{-\frac{\sqrt{\mu}t}{4}},$$

163 for any step size  $0 < s \leq 1/L$ . In particular, setting the step size to  $s = 1/L$ , we get

$$f(X) - f(x^*) \leq 2L\|x_0 - x^*\|^2 e^{-\frac{\sqrt{\mu}t}{4}}.$$

164 In the phase space representation, NAG-SC is formulated as

$$\begin{cases} x_{k+1} - x_k = \sqrt{s}v_k \\ v_{k+1} - v_k = -\frac{2\sqrt{\mu}s}{1-\sqrt{\mu}s}v_{k+1} - \sqrt{s}(\nabla f(x_{k+1}) - \nabla f(x_k)) - \frac{1+\sqrt{\mu}s}{1-\sqrt{\mu}s} \cdot \sqrt{s}\nabla f(x_{k+1}), \end{cases} \quad (3.2)$$

165 with the initial condition  $v_0 = -\frac{2\sqrt{s}\nabla f(x_0)}{1+\sqrt{\mu}s}$  for any  $x_0$ . This method maintains the accelerated rate  
166 of the ODE by recognizing

$$f(x_k) - f(x^*) \leq \frac{5L\|x_0 - x^*\|^2}{(1 + \sqrt{\mu/L}/12)^k};$$

167 (see Theorem 3 in Shi et al. [2018]) and the identification  $t \approx k\sqrt{s}$ .

168 Viewing NAG-SC as a numerical discretization of (2.5), one might wonder if any of the three  
169 simple Euler schemes—symplectic Euler scheme, explicit Euler scheme, and implicit Euler scheme—  
170 maintain the accelerated rate in discretizing the high-resolution ODE. For clarity, the update rules of  
171 the three schemes are given as follows, each with the initial points  $x_0$  and  $v_0 = -\frac{2\sqrt{s}\nabla f(x_0)}{1+\sqrt{\mu}s}$ .

172 **Euler scheme of (3.1): (S), (E) and (I) respectively**

$$\begin{aligned} \text{(S)} \quad & \begin{cases} x_{k+1} - x_k = \sqrt{s}v_k \\ v_{k+1} - v_k = -2\sqrt{\mu}s v_{k+1} - \sqrt{s}(\nabla f(x_{k+1}) - \nabla f(x_k)) - \sqrt{s}(1 + \sqrt{\mu}s)\nabla f(x_{k+1}). \end{cases} \\ \text{(E)} \quad & \begin{cases} x_{k+1} - x_k = \sqrt{s}v_k \\ v_{k+1} - v_k = -2\sqrt{\mu}s v_k - \sqrt{s}(\nabla f(x_{k+1}) - \nabla f(x_k)) - \sqrt{s}(1 + \sqrt{\mu}s)\nabla f(x_k). \end{cases} \\ \text{(I)} \quad & \begin{cases} x_{k+1} - x_k = \sqrt{s}v_{k+1} \\ v_{k+1} - v_k = -2\sqrt{\mu}s v_{k+1} - \sqrt{s}(\nabla f(x_{k+1}) - \nabla f(x_k)) - \sqrt{s}(1 + \sqrt{\mu}s)\nabla f(x_{k+1}). \end{cases} \end{aligned}$$

173 Among the three Euler schemes, the symplectic scheme is the *closest* to NAG-SC (3.2). More  
174 precisely, NAG-SC differs from the symplectic scheme only in an additional factor of  $\frac{1}{1-\sqrt{\mu}s}$  in  
175 the second line of (3.2). When the step size  $s$  is small, NAG-SC is, roughly speaking, a symplectic  
176 method if we make use of  $\frac{1}{1-\sqrt{\mu}s} \approx 1$ . In relating to the literature, the connection between accelerated  
177 methods and the symplectic schemes has been explored in Betancourt et al. [2018], which mainly  
178 considers the leapfrog integrator, a second-order symplectic integrator. In contrast, the symplectic  
179 Euler scheme studied in this paper is a first-order symplectic integrator.

180 Interestingly, the close resemblance between the two algorithms is found not only in their formulations,  
181 but also in their convergence rates, which are *both* accelerated as shown by Theorem B.1 and  
182 Theorem 3.1.

183 Note that the discrete Lyapunov function used in the proof of the symplectic Euler scheme of (3.1) is

$$\mathcal{E}(k) = \frac{1}{4}\|v_k\|^2 + \frac{1}{4}\|2\sqrt{\mu}(x_{k+1} - x^*) + v_k + \sqrt{s}\nabla f(x_k)\|^2$$

$$+ (1 + \sqrt{\mu s}) (f(x_k) - f(x^*)) - \frac{(1 + \sqrt{\mu s})^2}{1 + 2\sqrt{\mu s}} \cdot \frac{s}{2} \|\nabla f(x_k)\|^2. \quad (3.3)$$

184 The proof of Theorem B.1 is deferred to Appendix B.1. The following result is a useful consequence  
185 of this theorem.

186 **Theorem 3.1** (Discretization of NAG-SC ODE). For any  $f \in \mathcal{S}_{\mu,L}^1(\mathbb{R}^n)$ , the following conclusions  
187 hold:

188 (a) Taking step size  $s = 4/(9L)$ , the symplectic Euler scheme of (3.1) satisfies

$$f(x_k) - f(x^*) \leq \frac{5L \|x_0 - x^*\|^2}{\left(1 + \frac{1}{9}\sqrt{\frac{\mu}{L}}\right)^k}. \quad (3.4)$$

189 (b) Taking step size  $s = \mu/(100L^2)$ , the explicit Euler scheme of (3.1) satisfies

$$f(x_k) - f(x^*) \leq 3L \|x_0 - x^*\|^2 \left(1 - \frac{\mu}{80L}\right)^k. \quad (3.5)$$

190 (c) Taking step size  $s = 1/L$ , the implicit Euler scheme of (3.1) satisfies

$$f(x_k) - f(x^*) \leq \frac{13 \|x_0 - x^*\|^2}{4 \left(1 + \frac{1}{4}\sqrt{\frac{\mu}{L}}\right)^k}. \quad (3.6)$$

191 In addition, Theorem 3.1 shows that the implicit scheme also achieves acceleration. However, unlike  
192 NAG-SC, the symplectic scheme, and the explicit scheme, the implicit scheme is generally not easy  
193 to use in practice because it requires solving a nonlinear fixed-point equation when the objective is  
194 not quadratic. On the other hand, the explicit scheme can only take a smaller step size  $O(\mu/L^2)$ ,  
195 which prevents this scheme from achieving acceleration.

### 196 3.2 The heavy-ball method

197 We turn to the heavy-ball method ODE (2.4), whose phase space representation reads

$$\dot{X} = V, \quad \dot{V} = -2\sqrt{\mu}V - (1 + \sqrt{\mu s})\nabla f(X), \quad (3.7)$$

198 with the initial conditions  $X(0) = x_0$  and  $V(0) = -\frac{2\sqrt{s}\nabla f(x_0)}{1 + \sqrt{\mu s}}$ . Theorem 2 in Shi et al. [2018]  
199 shows that the solution  $X = X(t)$  to this ODE satisfies

$$f(X(t)) - f(x^*) \leq \frac{7 \|x_0 - x^*\|^2}{2s} e^{-\frac{\sqrt{\mu}t}{4}},$$

200 for  $f \in \mathcal{S}_{\mu,L}^1(\mathbb{R}^n)$  and any step size  $0 < s \leq 1/L$ . In particular, taking  $s = 1/L$  gives

$$f(X(t)) - f(x^*) \leq \frac{7L \|x_0 - x^*\|^2}{2} e^{-\frac{\sqrt{\mu}t}{4}}.$$

201 Returning to the discrete regime, Polyak's heavy-ball method uses the following update rule:

$$\begin{cases} x_{k+1} - x_k = \sqrt{s}v_k \\ v_{k+1} - v_k = -\frac{2\sqrt{\mu s}}{1 - \sqrt{\mu s}}v_{k+1} - \frac{1 + \sqrt{\mu s}}{1 - \sqrt{\mu s}} \cdot \sqrt{s}\nabla f(x_{k+1}), \end{cases}$$

202 which attains a non-accelerated rate (see Theorem 4 of Shi et al. [2018]):

$$f(x_k) - f(x^*) \leq \frac{5L \|x_0 - x^*\|^2}{\left(1 + \frac{\mu}{16L}\right)^k}. \quad (3.8)$$

203 The three simple Euler schemes for numerically solving the ODE (2.4) are given as follows. Every  
204 scheme starts with any arbitrary  $x_0$  and  $v_0 = -\frac{2\sqrt{s}\nabla f(x_0)}{1 + \sqrt{\mu s}}$ . As in the case of NAG-SC, the symplectic  
205 scheme is the closest to the heavy-ball method.

206 **Euler scheme of (3.7): (S), (E) and (I) respectively**

$$\begin{aligned}
\text{(S)} \quad & \begin{cases} x_{k+1} - x_k = \sqrt{s}v_k, \\ v_{k+1} - v_k = -2\sqrt{\mu s}v_{k+1} - \sqrt{s}(1 + \sqrt{\mu s})\nabla f(x_{k+1}). \end{cases} \\
\text{(E)} \quad & \begin{cases} x_{k+1} - x_k = \sqrt{s}v_k \\ v_{k+1} - v_k = -2\sqrt{\mu s}v_k - \sqrt{s}(1 + \sqrt{\mu s})\nabla f(x_k). \end{cases} \\
\text{(I)} \quad & \begin{cases} x_{k+1} - x_k = \sqrt{s}v_{k+1} \\ v_{k+1} - v_k = -2\sqrt{\mu s}v_{k+1} - \sqrt{s}(1 + \sqrt{\mu s})\nabla f(x_{k+1}). \end{cases}
\end{aligned}$$

207 The theorem below characterizes the convergence rates of the three schemes. This theorem is extended  
 208 to general step sizes by Theorem B.2 in Appendix B.2.

209 **Theorem 3.2** (Discretization of heavy-ball ODE). For any  $f \in \mathcal{S}_{\mu,L}^1(\mathbb{R}^n)$ , the following conclusions  
 210 hold:

211 (a) Taking step size  $s = \mu/(16L^2)$ , the symplectic Euler scheme of (3.7) satisfies

$$f(x_k) - f(x^*) \leq \frac{3L \|x_0 - x^*\|^2}{\left(1 + \frac{\mu}{16L}\right)^k}. \quad (3.9)$$

212 (b) Taking step size  $s = \mu/(36L^2)$ , the explicit Euler scheme of (3.7) satisfies

$$f(x_k) - f(x^*) \leq 3L \|x_0 - x^*\|^2 \left(1 - \frac{\mu}{48L}\right)^k. \quad (3.10)$$

213 (c) Taking step size  $s = 1/L$ , the implicit Euler scheme of (3.7) satisfies

$$f(x_k) - f(x^*) \leq \frac{15L \|x_0 - x^*\|^2}{4 \left(1 + \frac{1}{4}\sqrt{\frac{\mu}{L}}\right)^k}. \quad (3.11)$$

214 Taken together, (3.8) and Theorem 3.2 imply that neither the heavy-ball method nor the symplectic  
 215 scheme attains an accelerated rate. In contrast, the implicit scheme achieves acceleration as in the  
 216 NAG-SC case, but it is impractical except for quadratic objectives.

## 217 4 High-Resolution ODEs for Convex Functions

218 In this section, we turn to numerical discretization of the high-resolution ODE (2.6) related to NAG-C.  
 219 All proofs are deferred to Appendix C. This ODE in the phase space representation reads [Shi et al.,  
 220 2018] as follows:

$$\dot{X} = V, \quad \dot{V} = -\frac{3}{t} \cdot V - \sqrt{s}\nabla^2 f(X)V - \left(1 + \frac{3\sqrt{s}}{2t}\right) \nabla f(X), \quad (4.1)$$

221 with  $X(3\sqrt{s}/2) = x_0$  and  $V(3\sqrt{s}/2) = -\sqrt{s}\nabla f(x_0)$ . Theorem 5 of Shi et al. [2018] shows that  
 222 Let  $f \in \mathcal{F}_L^1(\mathbb{R}^n)$ . For any step size  $0 < s \leq 1/L$ , the solution  $X = X(t)$  of the high-resolution  
 223 ODE (2.6) satisfies

$$\begin{cases} f(X) - f(x^*) \leq \frac{(4 + 3sL) \|x_0 - x^*\|^2}{t(2t + \sqrt{s})} \\ \inf_{t_0 \leq u \leq t} \|\nabla f(X(u))\|^2 \leq \frac{(12 + 9sL) \|x_0 - x^*\|^2}{2\sqrt{s}(t^3 - t_0^3)} \end{cases}, \quad (4.2)$$

224 for any  $t > t_0 = 1.5\sqrt{s}$ . A caveat here is that it is unclear how to use a Lyapunov function to  
 225 prove convergence of the (simple) explicit, symplectic or implicit Euler scheme by direct numerical  
 226 discretization of the ODE (2.2). See Appendix C.2 for more discussion on this point. Therefore, we  
 227 slightly modify the ODE to the following one:

$$\dot{X} = V, \quad \dot{V} = -\frac{3}{t} \cdot V - \sqrt{s}\nabla^2 f(X)V - \left(1 + \frac{3\sqrt{s}}{t}\right) \nabla f(X). \quad (4.3)$$

228 The only difference is in the third term on the right-hand side of the second equation, where we replace  
 229  $\left(1 + \frac{3\sqrt{s}}{2t}\right) \nabla f(X)$  by  $\left(1 + \frac{3\sqrt{s}}{t}\right) \nabla f(X)$ . Now, we apply the three schemes on this (modified)  
 230 ODE in the phase space, including the original NAG-C, which all start with  $x_0$  and  $v_0 = -\sqrt{s} \nabla f(x_0)$ .  
 231 **Euler scheme of (4.3): (S), (E) and (I) respectively**

$$\begin{aligned}
 \text{(S)} \quad & \begin{cases} x_{k+1} - x_k = \sqrt{s} v_k \\ v_{k+1} - v_k = -\frac{3}{k+1} v_{k+1} - \sqrt{s} (\nabla f(x_{k+1}) - \nabla f(x_k)) - \sqrt{s} \left(\frac{k+4}{k+1}\right) \nabla f(x_{k+1}). \end{cases} \\
 \text{(E)} \quad & \begin{cases} x_{k+1} - x_k = \sqrt{s} v_k \\ v_{k+1} - v_k = -\frac{3}{k} v_k - \sqrt{s} (\nabla f(x_{k+1}) - \nabla f(x_k)) - \sqrt{s} \left(\frac{k+3}{k}\right) \nabla f(x_k). \end{cases} \\
 \text{(I)} \quad & \begin{cases} x_{k+1} - x_k = \sqrt{s} v_{k+1} \\ v_{k+1} - v_k = -\frac{3}{k+1} v_{k+1} - \sqrt{s} (\nabla f(x_{k+1}) - \nabla f(x_k)) - \sqrt{s} \left(\frac{k+4}{k+1}\right) \nabla f(x_{k+1}). \end{cases}
 \end{aligned}$$

232 **Theorem 4.1.** Let  $f \in \mathcal{F}_L^1(\mathbb{R}^n)$ . The following statements are true:

233 (a) For any step size  $0 < s \leq 1/(3L)$ , the symplectic Euler scheme of (4.3) (original NAG-C) satisfies  
 234

$$f(x_k) - f(x^*) \leq \frac{119 \|x_0 - x^*\|^2}{s(k+1)^2}, \quad \min_{0 \leq i \leq k} \|\nabla f(x_i)\|^2 \leq \frac{8568 \|x_0 - x^*\|^2}{s^2(k+1)^3}; \quad (4.4)$$

235 (b) Taking any step size  $0 < s \leq 1/L$ , the implicit Euler scheme of (4.3) satisfies

$$f(x_k) - f(x^*) \leq \frac{(3sL+2) \|x_0 - x^*\|^2}{s(k+2)(k+3)}, \quad \min_{0 \leq i \leq k} \|\nabla f(x_i)\|^2 \leq \frac{(3sL+2) \|x_0 - x^*\|^2}{s^2(k+1)^3}. \quad (4.5)$$

236 Note that Theorem 4.1 (a) is the same as Theorem 6 of Shi et al. [2018]. The explicit Euler scheme  
 237 does not guarantee convergence; see the analysis in Appendix C.1.

## 238 5 Discussion

239 In this paper, we have analyzed the convergence rates of three numerical discretization schemes—the  
 240 symplectic Euler scheme, explicit Euler scheme, and implicit Euler scheme—applied to ODEs that are  
 241 used for modeling Nesterov’s accelerated methods and Polyak’s heavy-ball method. The symplectic  
 242 scheme is shown to achieve accelerated rates for the high-resolution ODEs of NAG-SC and (slightly  
 243 modified) NAG-C [Shi et al., 2018], whereas no acceleration rates are observed when the same  
 244 scheme is used to discretize the low-resolution counterparts [Su et al., 2016]. For comparison, the  
 245 explicit scheme only allows for a small step size in discretizing these ODEs in order to ensure stability,  
 246 thereby failing to achieve acceleration. Although the implicit scheme is proved to yield accelerated  
 247 methods no matter whether high-resolution or low-resolution ODEs are discretized, this scheme is  
 248 generally not practical except for a limited number of cases (for example, quadratic objectives).

249 We conclude this paper by presenting several directions for future work. This work suggests that  
 250 both symplectic schemes and high-resolution ODEs are crucial for numerical discretization to  
 251 achieve acceleration. It would be of interest to formalize and prove this assertion. For example,  
 252 does any higher-order symplectic scheme maintain acceleration for the high-resolution ODEs of  
 253 NAGs? What is the fundamental mechanism of the gradient correction in high-resolution ODE in  
 254 stabilizing symplectic discretization? Moreover, since the discretizations are applied to the modified  
 255 high-resolution ODE of NAG-C, it is tempting to perform a comparison study between the two  
 256 high-resolution ODEs in terms of discretization properties. Finally, recognizing Nesterov’s method  
 257 (NAG-SC) is very similar to, but still different from, the corresponding symplectic scheme, one can  
 258 design new algorithms as interpolations of the two methods; it would be interesting to investigate the  
 259 convergence properties of these new algorithms.



## References

- Michael Betancourt, Michael I Jordan, and Ashia C Wilson. On symplectic optimization. *arXiv preprint arXiv:1802.03653*, 2018.
- Sébastien Bubeck. Convex optimization: Algorithms and complexity. *Foundations and Trends in Machine Learning*, 8(3-4):231–357, 2015.
- Jelena Diakonikolas and Lorenzo Orecchia. The approximate duality gap technique: A unified theory of first-order methods. *arXiv preprint arXiv:1712.02485*, 2017.
- Saeed Ghadimi and Guanghai Lan. Accelerated gradient methods for nonconvex nonlinear and stochastic programming. *Mathematical Programming*, 156(1-2):59–99, 2016.
- Ernst Hairer, Christian Lubich, and Gerhard Wanner. *Geometric numerical integration: structure-preserving algorithms for ordinary differential equations*, volume 31. Springer Science & Business Media, 2006.
- Walid Krichene and Peter L Bartlett. Acceleration and averaging in stochastic descent dynamics. In *Advances in Neural Information Processing Systems*, pages 6796–6806, 2017.
- Walid Krichene, Alexandre Bayen, and Peter L Bartlett. Accelerated mirror descent in continuous and discrete time. In *Advances in Neural Information Processing Systems*, pages 2845–2853, 2015.
- Yurii Nesterov. A method of solving a convex programming problem with convergence rate  $O(1/k^2)$ . *Soviet Mathematics Doklady*, 27(2):372–376, 1983.
- Yurii Nesterov. How to make the gradients small. *Optima*, 88:10–11, 2012.
- Yurii Nesterov. *Introductory Lectures on Convex Optimization: A Basic Course*, volume 87. Springer Science & Business Media, 2013.
- Boris T Polyak. Some methods of speeding up the convergence of iteration methods. *USSR Computational Mathematics and Mathematical Physics*, 4(5):1–17, 1964.
- Boris T Polyak. Introduction to optimization. *Optimization Software, Inc, New York*, 1987.
- Bin Shi, Simon S Du, Michael I Jordan, and Weijie J Su. Understanding the acceleration phenomenon via high-resolution differential equations. *arXiv preprint arXiv:1810.08907*, 2018.
- Weijie Su, Stephen Boyd, and Emmanuel J Candès. A differential equation for modeling Nesterov’s accelerated gradient method: theory and insights. *Journal of Machine Learning Research*, 17(153):1–43, 2016.
- Andre Wibisono, Ashia C Wilson, and Michael I Jordan. A variational perspective on accelerated methods in optimization. *Proceedings of the National Academy of Sciences*, 113(47):E7351–E7358, 2016.
- Ashia C Wilson, Benjamin Recht, and Michael I Jordan. A Lyapunov analysis of momentum methods in optimization. *arXiv preprint arXiv:1611.02635*, 2016.
- Jingzhao Zhang, Aryan Mokhtari, Suvrit Sra, and Ali Jadbabaie. Direct Runge–Kutta discretization achieves acceleration. *arXiv preprint arXiv:1805.00521*, 2018.

|     |                                                                   |           |
|-----|-------------------------------------------------------------------|-----------|
| 296 | <b>Contents</b>                                                   |           |
| 297 | <b>1 Introduction</b>                                             | <b>1</b>  |
| 298 | <b>2 Preliminaries</b>                                            | <b>3</b>  |
| 299 | 2.1 Approximating ODEs . . . . .                                  | 3         |
| 300 | 2.2 Discretization schemes . . . . .                              | 4         |
| 301 | <b>3 High-Resolution ODEs for Strongly Convex Functions</b>       | <b>4</b>  |
| 302 | 3.1 NAG-SC . . . . .                                              | 5         |
| 303 | 3.2 The heavy-ball method . . . . .                               | 6         |
| 304 | <b>4 High-Resolution ODEs for Convex Functions</b>                | <b>7</b>  |
| 305 | <b>5 Discussion</b>                                               | <b>8</b>  |
| 306 | <b>A Gradient Flow</b>                                            | <b>10</b> |
| 307 | A.1 Convergence rate of gradient flow . . . . .                   | 10        |
| 308 | A.2 Explicit Euler scheme . . . . .                               | 12        |
| 309 | A.3 Implicit Euler scheme . . . . .                               | 13        |
| 310 | <b>B Proofs for Section 3</b>                                     | <b>15</b> |
| 311 | B.1 Proof of Theorem B.1 . . . . .                                | 16        |
| 312 | B.2 Proof of Theorem 3.2 . . . . .                                | 20        |
| 313 | <b>C Technical Analysis and Proofs for Section 4</b>              | <b>23</b> |
| 314 | C.1 Technical details for numerical scheme of ODE (4.3) . . . . . | 23        |
| 315 | C.2 Technical details for standard numerical schemes . . . . .    | 25        |
| 316 | <b>D Low-Resolution ODEs</b>                                      | <b>27</b> |
| 317 | D.1 Low-resolution ODE for strongly convex functions . . . . .    | 27        |
| 318 | D.2 Low-resolution ODE for convex functions . . . . .             | 31        |
| 319 | D.2.1 Symplectic Euler scheme . . . . .                           | 31        |
| 320 | D.2.2 Explicit Euler scheme . . . . .                             | 32        |
| 321 | D.2.3 Implicit scheme . . . . .                                   | 33        |

## 322 A Gradient Flow

### 323 A.1 Convergence rate of gradient flow

324 The following theorem is the continuous-time version of Theorem 2.1.15 in Nesterov [2013].

325 **Theorem A.1.** Let  $f \in \mathcal{S}_{\mu,L}^1(\mathbb{R}^n)$ . The solution  $X = X(t)$  to the gradient flow (2.1) satisfies

$$\|X - x^*\| \leq e^{-\mu t} \|x_0 - x^*\|.$$

326 *Proof.* Taking the following Lyapunov function

$$\mathcal{E} = \|X - x^*\|^2,$$

327 we calculate its time derivative as

$$\begin{aligned}\frac{d\mathcal{E}}{dt} &= 2 \langle \dot{X}, X - x^* \rangle \\ &= -2 \langle \nabla f(X), X - x^* \rangle \\ &\leq -2\mu \|X - x^*\|^2.\end{aligned}$$

328 Thus, we complete the proof.  $\square$

329 The theorem below is a continuous version of Theorem 2.1.14 in Nesterov [2013].

330 **Theorem A.2.** Let  $f \in \mathcal{F}_L^1(\mathbb{R}^n)$ . The solution  $X = X(t)$  to the gradient flow (2.1) satisfies

$$f(X) - f(x^*) \leq \frac{(f(x_0) - f(x^*)) \|x_0 - x^*\|^2}{t(f(x_0) - f(x^*)) + \|x_0 - x^*\|^2}.$$

331 *Proof.* The time derivative of the distance function is

$$\begin{aligned}\frac{d}{dt} \|X - x^*\|^2 &= 2 \langle \dot{X}, X - x^* \rangle \\ &= -2 \langle \nabla f(X), X - x^* \rangle \\ &\leq 0.\end{aligned}$$

332 We define a Lyapunov function as

$$\mathcal{E} = f(X) - f(x^*).$$

333 With the basic convex inequality for  $f \in \mathcal{F}_L^1(\mathbb{R}^n)$ , we have

$$f(X) - f(x^*) \leq \langle \nabla f(X), X - x^* \rangle \leq \|\nabla f(X)\| \|x_0 - x^*\|.$$

334 Furthermore, we obtain that the time derivative is

$$\frac{d\mathcal{E}}{dt} = \langle \nabla f(X), \dot{X} \rangle = -\|\nabla f(X)\|^2 \leq -\frac{(f(X) - f(x^*))^2}{\|x_0 - x^*\|^2} = -\frac{\mathcal{E}^2}{\|x_0 - x^*\|^2}.$$

335 Hence, the convergence rate is

$$f(X) - f(x^*) \leq \frac{(f(x_0) - f(x^*)) \|x_0 - x^*\|^2}{t(f(x_0) - f(x^*)) + \|x_0 - x^*\|^2}.$$

336  $\square$

337 The following theorem is based on the Lyapunov function for gradient flow (2.1) in Su et al. [2016].

338 **Theorem A.3.** Let  $f \in \mathcal{F}_L^1(\mathbb{R}^n)$ . The solution  $X = X(t)$  to the gradient flow (2.1) satisfies

$$\begin{cases} f(X) - f(x^*) \leq \frac{\|x_0 - x^*\|^2}{2t} \\ \min_{0 \leq u \leq t} \|\nabla f(X(u))\|^2 \leq \frac{\|x_0 - x^*\|^2}{t^2}. \end{cases}$$

339 *Proof.* The Lyapunov function is

$$\mathcal{E} = t(f(X) - f(x^*)) + \frac{1}{2} \|X - x^*\|^2.$$

340 We calculate its time derivative as

$$\begin{aligned}\frac{d\mathcal{E}}{dt} &= f(X) - f(x^*) + t \langle \nabla f(X), \dot{X} \rangle + \langle X - x^*, \dot{X} \rangle \\ &= f(X) - f(x^*) - \langle \nabla f(X), X - x^* \rangle - t \|\nabla f(X)\|_2^2 \\ &\leq -t \|\nabla f(X)\|^2.\end{aligned}$$

341 Thus, we complete the proof.  $\square$

342 **Remark A.1.** From the view of Lyapunov function, Theorem A.3 is essentially different from  
 343 Theorem A.2. When the Lyapunov function

$$\mathcal{E} = t(f(X) - f(x^*)) + \frac{1}{2} \|X - x^*\|^2$$

344 is used to take place of that

$$\mathcal{E} = f(X) - f(x^*),$$

345 the same convergence rate for function value is not only obtained by the simple way of calculation,  
 346 but we can also capture an advanced faster speed of the squared gradient norm. From this view,  
 347 constructing Lyapunov function is a more powerful and advanced mathematical tool for optimization.

## 348 A.2 Explicit Euler scheme

349 The corresponding explicit-scheme version of Theorem A.1 is just Theorem 2.1.15 in Nesterov  
 350 [2013]. We state it below.

351 **Theorem A.4** (Theorem 2.1.15, Nesterov [2013]). Let  $f \in \mathcal{S}_{\mu,L}^1(\mathbb{R}^n)$ . Taking any step size  $0 < s \leq$   
 352  $2/(\mu + L)$ , the iterates  $\{x_k\}_{k=0}^\infty$  generated by GD (1.2) satisfy

$$\|x_k - x^*\|^2 \leq \left(1 - \frac{2\mu L s}{\mu + L}\right) \|x_0 - x^*\|^2.$$

353 In addition, if the step size is set to  $s = 2/(\mu + L)$ , we get

$$\|x_k - x^*\|^2 \leq \left(\frac{L - \mu}{L + \mu}\right)^2 \|x_0 - x^*\|^2.$$

354 This proof is from Nesterov [2013]. The only conceptual difference is that we use the Lyapunov  
 355 function

$$\mathcal{E}(k) = \|x_k - x^*\|^2,$$

356 instead of the distance function  $r_k$  in Nesterov [2013].

357 The corresponding explicit version of Theorem A.2 is Theorem 2.1.14 in Nesterov [2013]. We also  
 358 state it as follows.

359 **Theorem A.5** (Theorem 2.1.14, Nesterov [2013]). Let  $f \in \mathcal{F}_L^1(\mathbb{R}^n)$ . Taking any step size  $0 < s <$   
 360  $2/L$ , the iterates  $\{x_k\}_{k=0}^\infty$  generated by GD (1.2) satisfy

$$f(x_k) - f(x^*) \leq \frac{2(f(x_0) - f(x^*)) \|x_0 - x^*\|^2}{2\|x_0 - x^*\|^2 + ks(2 - Ls)(f(x_0) - f(x^*))}. \quad (\text{A.1})$$

361 In addition, if the step size is set to  $s = 1/L$ , we get

$$f(x_k) - f(x^*) \leq \frac{2L \|x_0 - x^*\|^2}{k + 4}. \quad (\text{A.2})$$

362 Again, Nesterov [2013] uses the Lyapunov function  $\mathcal{E}(k)$  instead of  $r_k$ .

363 Finally, we show the corresponding discrete version of Theorem A.3, highlighting the ODE-based  
 364 approach and the importance of Lyapunov functions in proofs.

365 **Theorem A.6.** Let  $f \in \mathcal{F}_L^1(\mathbb{R}^n)$ . Taking any step size  $0 < s \leq 1/L$ , the iterates  $\{x_k\}_{k=0}^\infty$  generated  
 366 by GD (1.2) satisfy

$$\begin{cases} f(x_k) - f(x^*) \leq \frac{\|x_0 - x^*\|^2}{2ks} \\ \min_{0 \leq i \leq k} \|\nabla f(x_i)\|^2 \leq \frac{2\|x_0 - x^*\|^2}{s^2(k+1)(k+2)}. \end{cases} \quad (\text{A.3})$$

367 In addition, if the step size is set  $s = 1/L$ , we have

$$\begin{cases} f(x_k) - f(x^*) \leq \frac{L \|x_0 - x^*\|^2}{2k} \\ \min_{0 \leq i \leq k} \|\nabla f(x_i)\|^2 \leq \frac{2L^2 \|x_0 - x^*\|^2}{(k+1)(k+2)}. \end{cases} \quad (\text{A.4})$$

368 To obtain this result, we use a Lyapunov function that is different from the standard analysis of  
 369 gradient descent, which uses the Lyapunov function  $\mathcal{E}(k) \triangleq f(x_k) - f(x^*)$ . This Lyapunov  
 370 function yields the  $O(L/k)$  convergence rate for the function value. For the squared gradient norm,  
 371 however, this Lyapunov function can only exploit the  $L$ -smoothness property that transforms the  
 372 function value to the gradient norm, giving the sub-optimal  $O(L^2/k)$  rate, due to the absence  
 373 of gradient information in this function. Our proof uses a different Lyapunov function:  $\mathcal{E}(k) =$   
 374  $ks(f(x_k) - f(x^*)) + \frac{1}{2} \|x_k - x^*\|^2$ .

375 *Proof.* The corresponding discrete Lyapunov function is constructed as below

$$\mathcal{E}(k) = ks(f(x_k) - f(x^*)) + \frac{1}{2} \|x_k - x^*\|^2,$$

376 from which we get

$$\begin{aligned} & \mathcal{E}(k+1) - \mathcal{E}(k) \\ &= s(f(x_k) - f(x^*)) + (k+1)s(f(x_{k+1}) - f(x_k)) + \frac{1}{2} \langle x_{k+1} - x_k, x_{k+1} + x_k - 2x^* \rangle \\ &\leq s(f(x_k) - f(x^*) - \langle \nabla f(x_k), x_k - x^* \rangle) + (k+1)s \langle \nabla f(x_k), x_{k+1} - x_k \rangle \\ &\quad + \left[ \frac{(k+1)sL}{2} + \frac{1}{2} \right] \|x_{k+1} - x_k\|^2 \\ &\leq s^2 \left[ -\frac{1}{2Ls} - (k+1) + \frac{(k+1)sL}{2} + \frac{1}{2} \right] \|\nabla f(x_k)\|^2 \\ &\leq -\frac{s^2}{2} (k+1) \|\nabla f(x_k)\|^2 \end{aligned}$$

377 Taking  $k_0$  in the assumption completes the proof.  $\square$

378 **Remark A.2.** Same as the continuous ODE in Remark A.1, from view of the discrete algorithm, we  
 379 can find the apunov function is a more powerful and advanced mathematical tool.

### 380 A.3 Implicit Euler scheme

381 Next, we consider the implicit Euler scheme of the gradient flow (2.1) as

$$x_{k+1} = x_k - s \nabla f(x_{k+1}), \quad (\text{A.5})$$

382 with any initial  $x_0 \in \mathbb{R}^n$ . The corresponding implicit version of Theorem A.1 is shown as below.

383 **Theorem A.7.** Let  $f \in \mathcal{S}_{\mu,L}^1(\mathbb{R}^n)$ , the iterates  $\{x_k\}_{k=0}^\infty$  generated by implicit gradient descent (A.5)  
 384 satisfy

$$\|x_k - x^*\| \leq \frac{1}{(1 + \mu s)^k} \cdot \|x_0 - x^*\|. \quad (\text{A.6})$$

385 In addition, if the step size  $s = \theta/\mu$ , where  $\theta > 0$ , we have

$$\|x_k - x^*\| \leq \frac{1}{(1 + \theta)^k} \|x_0 - x^*\|. \quad (\text{A.7})$$

386 *Proof.* The Lyapunov function is

$$\mathcal{E}(k) = \|x_k - x^*\|^2.$$

387 Then, we calculate the iterate difference as

$$\begin{aligned} \mathcal{E}(k+1) - \mathcal{E}(k) &= \|x_{k+1} - x^*\|^2 - \|x_k - x^*\|^2 \\ &= \langle x_{k+1} - x_k, x_{k+1} + x_k - 2x^* \rangle \\ &= -2s \langle \nabla f(x_{k+1}), x_{k+1} - x^* \rangle - s^2 \|\nabla f(x_{k+1})\|^2 \\ &\leq -(2\mu s + \mu^2 s^2) \mathcal{E}(k+1). \end{aligned}$$

388 Hence, the proof is complete.  $\square$

Next, we show the implicit version of Theorem A.2 as follows.

**Theorem A.8.** Let  $f \in \mathcal{F}_L^1(\mathbb{R}^n)$ . The iterates  $\{x_k\}_{k=0}^\infty$  generated by implicit gradient descent (A.5) satisfy

$$f(x_k) - f(x^*) \leq \frac{(1 + Ls)^2 (f(x_0) - f(x^*)) \|x_0 - x^*\|^2}{(1 + Ls)^2 \|x_0 - x^*\|^2 + ks (f(x_0) - f(x^*))}. \quad (\text{A.8})$$

In addition, if the step size is set to  $s = \theta/L$ , we have

$$f(x_k) - f(x^*) \leq \frac{L \|x_0 - x^*\|^2}{2 + k \cdot \frac{1}{\theta + \frac{1}{\theta} + 2}}. \quad (\text{A.9})$$

*Proof.* Note that the distance function  $\|x_k - x^*\|^2$  decreases with the iteration number  $k$  as

$$\begin{aligned} \|x_{k+1} - x^*\|^2 - \|x_k - x^*\|^2 &= -2s \langle \nabla f(x_{k+1}), x_{k+1} - x^* \rangle - s^2 \|\nabla f(x_{k+1})\|^2 \\ &\leq -s \left( \frac{2}{L} + s \right) \|\nabla f(x_{k+1})\|^2 \\ &\leq 0. \end{aligned}$$

With the basic convex inequality for  $f \in \mathcal{F}_L^1(\mathbb{R}^n)$ , we have

$$f(x_{k+1}) - f(x^*) \leq \langle \nabla f(x_{k+1}), x_{k+1} - x^* \rangle \leq \|\nabla f(x_{k+1})\| \cdot \|x_0 - x^*\|.$$

Now, the Lyapunov function is defined as

$$\mathcal{E}(k) = f(x_k) - f(x^*).$$

Then we calculate the difference at the  $k$ th-iteration as

$$\begin{aligned} \mathcal{E}(k+1) - \mathcal{E}(k) &= (f(x_{k+1}) - f(x^*)) - (f(x_k) - f(x^*)) \\ &\geq \langle \nabla f(x_{k+1}), x_{k+1} - x_k \rangle - \frac{L}{2} \|x_{k+1} - x_k\|^2 \\ &\geq -s \left( 1 + \frac{Ls}{2} \right) \|\nabla f(x_{k+1})\|^2 \\ &\geq -2Ls \left( 1 + \frac{Ls}{2} \right) \mathcal{E}(k+1) \end{aligned}$$

and

$$\begin{aligned} \mathcal{E}(k+1) - \mathcal{E}(k) &= (f(x_{k+1}) - f(x^*)) - (f(x_k) - f(x^*)) \\ &\leq \langle \nabla f(x_{k+1}), x_{k+1} - x_k \rangle \\ &= -s \cdot \|\nabla f(x_{k+1})\|^2 \\ &\leq -s \cdot \frac{\mathcal{E}(k+1)^2}{\|x_0 - x^*\|_2^2} \\ &\leq -s \cdot \frac{\mathcal{E}(k+1)}{\mathcal{E}(k)} \cdot \frac{\mathcal{E}(k)\mathcal{E}(k+1)}{\|x_0 - x^*\|^2} \\ &\leq -\frac{s}{(1 + Ls)^2} \cdot \frac{\mathcal{E}(k)\mathcal{E}(k+1)}{\|x_0 - x^*\|^2}. \end{aligned}$$

Hence, the convergence rate is given as

$$f(x_k) - f(x^*) \leq \frac{(1 + Ls)^2 (f(x_0) - f(x^*)) \|x_0 - x^*\|^2}{(1 + Ls)^2 \|x_0 - x^*\|^2 + ks (f(x_0) - f(x^*))}.$$

□

Finally, we present the implicit version of Theorem A.3.

401 **Theorem A.9.** Let  $f \in \mathcal{F}_L^1(\mathbb{R}^n)$ . The iterates  $\{x_k\}_{k=0}^\infty$  generated by implicit gradient descent (A.5)  
 402 satisfy

$$\begin{cases} f(x_k) - f(x^*) \leq \frac{\|x_0 - x^*\|^2}{2ks} \\ \min_{0 \leq i \leq k} \|\nabla f(x_i)\|^2 \leq \frac{2\|x_0 - x^*\|^2}{s^2(k+1)(k+2)}. \end{cases} \quad (\text{A.10})$$

403 In addition, if the step size is set to  $s = 1/L$ , we have

$$\begin{cases} f(x_k) - f(x^*) \leq \frac{L\|x_0 - x^*\|^2}{2k} \\ \min_{0 \leq i \leq k} \|\nabla f(x_i)\|^2 \leq \frac{2L^2\|x_0 - x^*\|^2}{(k+1)(k+2)}. \end{cases} \quad (\text{A.11})$$

404 *Proof.* The Lyapunov function is

$$\mathcal{E}(k) = ks(f(x_k) - f(x^*)) + \frac{1}{2}\|x_k - x^*\|^2.$$

405 Then, we calculate the iterate difference as

$$\begin{aligned} & \mathcal{E}(k+1) - \mathcal{E}(k) \\ &= s(f(x_{k+1}) - f(x^*)) + ks(f(x_{k+1}) - f(x_k)) + \frac{1}{2}\langle x_{k+1} - x_k, x_{k+1} + x_k - 2x^* \rangle \\ &\leq s(f(x_{k+1}) - f(x^*) - \langle \nabla f(x_{k+1}), x_{k+1} - x^* \rangle) \\ &\quad + ks\langle \nabla f(x_{k+1}), x_{k+1} - x_k \rangle - \frac{1}{2}\|x_{k+1} - x_k\|^2 \\ &\leq -s^2\left(\frac{1}{2Ls} + k + \frac{1}{2}\right)\|\nabla f(x_{k+1})\|^2 \\ &\leq -\frac{s^2}{2}(k+1)\|\nabla f(x_{k+1})\|^2. \end{aligned}$$

406 Hence, the proof is complete.  $\square$

## 407 B Proofs for Section 3

408 Here, we first describe and prove Theorem B.1 below. Then we complete the proof of Theorem 3.1  
 409 by viewing it as a special case of Theorem B.1.

410 **Theorem B.1** (Discretization of NAG-SC ODE — General). For any  $f \in \mathcal{S}_{\mu,L}^1(\mathbb{R}^n)$ , the following  
 411 conclusions hold:

412 (a) Taking  $0 < s \leq 4/(9L)$ , the symplectic Euler scheme satisfies

$$\begin{aligned} & f(x_k) - f(x^*) \\ &\leq \left( \frac{sL(2 + (1 + 3\sqrt{\mu s})^2)}{(1 + \sqrt{\mu s})^2} + \frac{2\mu}{L} + \frac{1 + \sqrt{\mu s}}{2} - \frac{sL(1 + \sqrt{\mu s})^2}{2(1 + 2\sqrt{\mu s})} \right) \frac{L\|x_0 - x^*\|^2}{\left(1 + \frac{\sqrt{\mu s}}{6}\right)^k}. \end{aligned} \quad (\text{B.1})$$

413 (b) Taking  $0 < s \leq \mu/(100L^2)$ , the explicit Euler scheme satisfies

$$\begin{aligned} & f(x_k) - f(x^*) \\ &\leq \left( \frac{3 - 2\sqrt{\mu s} + \mu s}{2 + 4\sqrt{\mu s} + 2\mu s} \cdot sL + \frac{2\mu}{L} + \frac{1 + \sqrt{\mu s}}{2} \right) L\|x_0 - x^*\|^2 \left(1 - \frac{\sqrt{\mu s}}{8}\right)^k. \end{aligned} \quad (\text{B.2})$$

414 (c) Taking  $0 < s \leq 1/L$ , the implicit Euler scheme satisfies

$$f(x_k) - f(x^*) \leq \left( \frac{3 - 2\sqrt{\mu s} + \mu s}{2 + 4\sqrt{\mu s} + 2\mu s} \cdot sL + \frac{2\mu}{L} + \frac{1 + \sqrt{\mu s}}{2} \right) \frac{L\|x_0 - x^*\|^2}{\left(1 + \frac{\sqrt{\mu s}}{4}\right)^k}. \quad (\text{B.3})$$

415 **B.1 Proof of Theorem B.1**

416 (a) The Lyapunov function is constructed as

$$\begin{aligned}\mathcal{E}(k) &= \frac{1}{4} \|v_k\|^2 + \frac{1}{4} \|2\sqrt{\mu}(x_{k+1} - x^*) + v_k + \sqrt{s}\nabla f(x_k)\|^2 \\ &\quad + (1 + \sqrt{\mu s})(f(x_k) - f(x^*)) - \frac{(1 + \sqrt{\mu s})^2}{1 + 2\sqrt{\mu s}} \cdot \frac{s}{2} \|\nabla f(x_k)\|^2.\end{aligned}$$

417 With the basic inequality for  $f \in \mathcal{S}_{\mu,L}^1(\mathbb{R}^n)$

$$f(x_{k+1}) - f(x_k) \leq \langle \nabla f(x_{k+1}), x_{k+1} - x_k \rangle - \frac{1}{2L} \|\nabla f(x_{k+1}) - \nabla f(x_k)\|^2,$$

418 then the iterate difference can be calculated as

$$\begin{aligned}\mathcal{E}(k+1) - \mathcal{E}(k) &= \frac{1}{4} \langle v_{k+1} - v_k, v_{k+1} + v_k \rangle + (1 + \sqrt{\mu s})(f(x_{k+1}) - f(x_k)) \\ &\quad + \frac{1}{4} \langle 2\sqrt{\mu}(x_{k+2} - x_{k+1}) + v_{k+1} - v_k + \sqrt{s}(\nabla f(x_{k+1}) - \nabla f(x_k)), \\ &\quad 2\sqrt{\mu}(x_{k+2} + x_{k+1} - 2x^*) + v_{k+1} + v_k \\ &\quad + \sqrt{s}(\nabla f(x_{k+1}) + \nabla f(x_k)) \rangle \\ &\quad - \frac{(1 + \sqrt{\mu s})^2}{1 + 2\sqrt{\mu s}} \cdot \frac{s}{2} (\|\nabla f(x_{k+1})\|^2 - \|\nabla f(x_k)\|^2) \\ &\leq -\sqrt{\mu s} \|v_{k+1}\|^2 - \frac{\sqrt{s}}{2(1 + \sqrt{\mu s})} \langle \nabla f(x_{k+1}) - \nabla f(x_k), v_k \rangle \\ &\quad + \frac{s}{2(1 + 2\sqrt{\mu s})} \|\nabla f(x_{k+1}) - \nabla f(x_k)\|^2 \\ &\quad + \frac{s}{2} \cdot \frac{1 + \sqrt{\mu s}}{1 + 2\sqrt{\mu s}} \langle \nabla f(x_{k+1}) - \nabla f(x_k), \nabla f(x_{k+1}) \rangle \\ &\quad - \frac{\sqrt{s}(1 + \sqrt{\mu s})}{2} \langle \nabla f(x_{k+1}), v_{k+1} \rangle - \frac{1}{4} \|v_{k+1} - v_k\|^2 \\ &\quad + (1 + \sqrt{\mu s}) \sqrt{s} \langle \nabla f(x_{k+1}), v_k \rangle - \frac{1 + \sqrt{\mu s}}{2L} \|\nabla f(x_{k+1}) - \nabla f(x_k)\|^2 \\ &\quad - \frac{1}{2} \langle (1 + \sqrt{\mu s}) \sqrt{s} \nabla f(x_{k+1}), \\ &\quad (1 + 2\sqrt{\mu s}) v_{k+1} + 2\sqrt{\mu}(x_{k+1} - x^*) + \sqrt{s} \nabla f(x_{k+1}) \rangle \\ &\quad - \frac{1}{4} (1 + \sqrt{\mu s})^2 s \|\nabla f(x_{k+1})\|^2 - \frac{s}{2} (\|\nabla f(x_{k+1})\|^2 - \|\nabla f(x_k)\|^2) \\ &\leq -\sqrt{\mu s} (\|v_{k+1}\|^2 + (1 + \sqrt{\mu s}) \langle \nabla f(x_{k+1}), x_{k+1} - x^* \rangle) \\ &\quad - \left( \frac{1 + \sqrt{\mu s}}{2} \right) \left[ \sqrt{s} \langle \nabla f(x_{k+1}), (1 + 2\sqrt{\mu s}) v_{k+1} - v_k \rangle + s \|\nabla f(x_{k+1})\|^2 \right] \\ &\quad - \frac{\sqrt{s}}{2(1 + \sqrt{\mu s})} \langle \nabla f(x_{k+1}) - \nabla f(x_k), v_k \rangle \\ &\quad + \frac{s}{2} \cdot \frac{1 + \sqrt{\mu s}}{1 + 2\sqrt{\mu s}} \langle \nabla f(x_{k+1}) - \nabla f(x_k), \nabla f(x_{k+1}) \rangle \\ &\quad - \frac{1}{4} \left[ \|v_{k+1} - v_k\|^2 + (1 + \sqrt{\mu s})^2 s \|\nabla f(x_{k+1})\|^2 \right. \\ &\quad \left. + 2(1 + \sqrt{\mu s}) \sqrt{s} \langle \nabla f(x_{k+1}), v_{k+1} - v_k \rangle \right] \\ &\quad - \frac{1}{2} \left( \frac{1 + \sqrt{\mu s}}{L} - \frac{s}{1 + 2\sqrt{\mu s}} \right) \|\nabla f(x_{k+1}) - \nabla f(x_k)\|^2\end{aligned}$$



$$-\frac{(1+\sqrt{\mu s})^2}{1+2\sqrt{\mu s}} \cdot \frac{s}{2} \left( \|\nabla f(x_{k+1})\|^2 - \|\nabla f(x_k)\|^2 \right).$$

419

Noting the following two inequalities

$$\begin{aligned} & -\frac{1}{4} \left[ \|v_{k+1} - v_k\|^2 + (1+\sqrt{\mu s})^2 s \|\nabla f(x_{k+1})\|^2 \right. \\ & \quad \left. + 2(1+\sqrt{\mu s})\sqrt{s} \langle \nabla f(x_{k+1}), v_{k+1} - v_k \rangle \right] \\ & = -\frac{1}{4} \|v_{k+1} - v_k + (1+\sqrt{\mu s})\sqrt{s} \nabla f(x_k)\|^2 \leq 0, \end{aligned}$$

420

and

$$\begin{aligned} & -\frac{1}{2} (1+\sqrt{\mu s}) \left[ \sqrt{s} \langle \nabla f(x_{k+1}), (1+2\sqrt{\mu s})v_{k+1} - v_k \rangle + s \|\nabla f(x_{k+1})\|^2 \right] \\ & = -\left( \frac{1+\sqrt{\mu s}}{2} \right) [\sqrt{s} \langle \nabla f(x_{k+1}), \\ & \quad -\sqrt{s}(\nabla f(x_{k+1}) - \nabla f(x_k)) - \sqrt{s}(1+\sqrt{\mu s})\nabla f(x_{k+1}) \rangle \\ & \quad + s \|\nabla f(x_{k+1})\|^2] \\ & = \frac{(1+\sqrt{\mu s})s}{2} \left( \langle \nabla f(x_{k+1}) - \nabla f(x_k), \nabla f(x_{k+1}) \rangle + \sqrt{\mu s} \|\nabla f(x_{k+1})\|^2 \right), \end{aligned}$$

421

we see that the iterate difference is

$$\begin{aligned} & \mathcal{E}(k+1) - \mathcal{E}(k) \\ & \leq -\sqrt{\mu s} \left[ \|v_{k+1}\|^2 + (1+\sqrt{\mu s}) \left( \langle \nabla f(x_{k+1}), x_{k+1} - x^* \rangle - \frac{s}{2} \|\nabla f(x_{k+1})\|^2 \right) \right] \\ & \quad - \frac{1}{2(1+\sqrt{\mu s})} \langle \nabla f(x_{k+1}) - \nabla f(x_k), x_{k+1} - x_k \rangle \\ & \quad + \frac{(1+\sqrt{\mu s})^2}{1+2\sqrt{\mu s}} \cdot s \langle \nabla f(x_{k+1}), \nabla f(x_{k+1}) - \nabla f(x_k) \rangle \\ & \quad - \frac{1}{2} \left( \frac{1+\sqrt{\mu s}}{L} - \frac{s}{1+2\sqrt{\mu s}} \right) \|\nabla f(x_{k+1}) - \nabla f(x_k)\|^2 \\ & \quad - \frac{(1+\sqrt{\mu s})^2}{1+2\sqrt{\mu s}} \cdot \frac{s}{2} \left( \|\nabla f(x_{k+1})\|^2 - \|\nabla f(x_k)\|^2 \right) \\ & \leq -\sqrt{\mu s} \left[ \|v_{k+1}\|^2 + (1+\sqrt{\mu s}) \left( \langle \nabla f(x_{k+1}), x_{k+1} - x^* \rangle - \frac{s}{2} \|\nabla f(x_{k+1})\|^2 \right) \right] \\ & \quad - \frac{1}{2(1+\sqrt{\mu s})} \langle \nabla f(x_{k+1}) - \nabla f(x_k), x_{k+1} - x_k \rangle \\ & \quad + \frac{1}{2} \left( \frac{1}{1+2\sqrt{\mu s}} + \frac{(1+\sqrt{\mu s})^2}{1+2\sqrt{\mu s}} - \frac{1+\sqrt{\mu s}}{Ls} \right) s \|\nabla f(x_{k+1}) - \nabla f(x_k)\|^2. \end{aligned}$$

422

Furthermore, taking the basic inequality for  $f \in \mathcal{S}_{\mu, L}^1(\mathbb{R}^n)$

$$\langle \nabla f(x_{k+1}) - \nabla f(x_k), x_{k+1} - x_k \rangle \geq \frac{1}{L} \|\nabla f(x_{k+1}) - \nabla f(x_k)\|^2,$$

423

the iterate difference can be calculated as

$$\begin{aligned} & \mathcal{E}(k+1) - \mathcal{E}(k) \\ & \leq -\sqrt{\mu s} \left[ \|v_{k+1}\|^2 + (1+\sqrt{\mu s}) \left( \langle \nabla f(x_{k+1}), x_{k+1} - x^* \rangle - \frac{s}{2} \|\nabla f(x_{k+1})\|^2 \right) \right] \\ & \quad - \frac{2+2\sqrt{\mu s}+\mu s}{2(1+2\sqrt{\mu s})} \left( \frac{1}{L} - s \right) \|\nabla f(x_{k+1}) - \nabla f(x_k)\|^2. \end{aligned}$$

424

Next, we consider how to set the step size  $s$ . First, when the step size satisfies  $s \leq 1/L$ , we have

425

$$\mathcal{E}(k+1) - \mathcal{E}(k)$$

$$\leq -\sqrt{\mu s} \left[ \|v_{k+1}\|^2 + (1 + \sqrt{\mu s}) \left( \langle \nabla f(x_{k+1}), x_{k+1} - x^* \rangle - \frac{s}{2} \|\nabla f(x_{k+1})\|^2 \right) \right].$$

426 Noting the basic inequality for  $f \in \mathcal{S}_{\mu,L}^1(\mathbb{R}^n)$

$$f(x_{k+1}) - f(x^*) \leq \langle \nabla f(x_{k+1}), x_{k+1} - x^* \rangle - \frac{1}{2L} \|\nabla f(x_{k+1})\|^2,$$

427 the iterate difference can be obtained as

$$\begin{aligned} & \mathcal{E}(k+1) - \mathcal{E}(k) \\ & \leq -\sqrt{\mu s} [(f(x_{k+1}) - f(x^*)) + \|v_{k+1}\|^2 + \frac{\mu}{2} \|x_k - x^*\|^2 \\ & \quad + \sqrt{\mu s} \left( f(x_{k+1}) - f(x^*) - \frac{s}{2} \|\nabla f(x_{k+1})\|^2 \right)]. \end{aligned}$$

428 Furthermore, using the Cauchy-Schwarz inequality

$$\begin{aligned} & \|2\sqrt{\mu}(x_{k+1} - x^*) + v_k + \sqrt{s}\nabla f(x_k)\|^2 \\ & = \|2\sqrt{\mu}(x_k - x^*) + (1 + 2\sqrt{\mu s})v_k + \sqrt{s}\nabla f(x_k)\|^2 \\ & \leq 3 \left( 4\mu \|x_k - x^*\|^2 + (1 + 2\sqrt{\mu s})^2 \|v_k\|^2 + s \|\nabla f(x_k)\|^2 \right), \end{aligned}$$

429 and the following basic inequality for  $f \in \mathcal{S}_{\mu,L}^1(\mathbb{R}^n)$

$$\begin{aligned} & \frac{3s}{4} \|\nabla f(x_k)\|^2 - \frac{(1 + \sqrt{\mu s})^2}{1 + 2\sqrt{\mu s}} \cdot \frac{s}{2} \|\nabla f(x_k)\|^2 \\ & \leq \frac{Ls}{2} (f(x_k) - f(x^*)) - \frac{\mu s^2}{2(1 + 2\sqrt{\mu s})} \|\nabla f(x_k)\|^2, \end{aligned}$$

430 the Lyapunov function satisfies

$$\begin{aligned} \mathcal{E}(k) & \leq \left( 1 + \sqrt{\mu s} + \frac{Ls}{2} \right) (f(x_k) - f(x^*)) + (1 + 3\sqrt{\mu s} + 3\mu s) \|v_k\|^2 \\ & \quad + 3\mu \|x_k - x^*\|^2 + \frac{\mu s}{1 + 2\sqrt{\mu s}} \left( f(x_k) - f(x^*) - \frac{s}{2} \|\nabla f(x_k)\|^2 \right). \end{aligned}$$

431 Therefore, when  $s \leq 4/(9L)$ , the iterate difference for the Lyapunov function satisfies

$$\mathcal{E}(k+1) - \mathcal{E}(k) \leq -\frac{\sqrt{\mu s}}{6} \mathcal{E}(k+1).$$

432 Hence, the proof is complete.

433 (b) The Lyapunov function is

$$\begin{aligned} \mathcal{E}(k) & = \frac{1}{4} \|v_k\|^2 + (1 + \sqrt{\mu s}) (f(x_k) - f(x^*)) \\ & \quad + \frac{1}{4} \|2\sqrt{\mu}(x_k - x^*) + v_k + \sqrt{s}\nabla f(x_k)\|^2. \end{aligned}$$

434 With the basic inequality for  $f \in \mathcal{S}_{\mu,L}^1(\mathbb{R}^n)$

$$f(x_{k+1}) - f(x_k) \leq \langle \nabla f(x_k), x_{k+1} - x_k \rangle + \frac{L}{2} \|x_{k+1} - x_k\|^2,$$

435 we can calculate the iterate difference

$$\begin{aligned} & \mathcal{E}(k+1) - \mathcal{E}(k) \\ & = \frac{1}{4} \langle v_{k+1} - v_k, v_{k+1} + v_k \rangle + (1 + \sqrt{\mu s}) (f(x_{k+1}) - f(x_k)) \\ & \quad + \frac{1}{4} \langle 2\sqrt{\mu}(x_{k+1} - x_k) + v_{k+1} - v_k + \sqrt{s}(\nabla f(x_{k+1}) - \nabla f(x_k)), \\ & \quad 2\sqrt{\mu}(x_{k+1} + x_k - 2x^*) + v_{k+1} + v_k + \sqrt{s}(\nabla f(x_{k+1}) + \nabla f(x_k)) \rangle \end{aligned}$$

$$\begin{aligned}
&\leq \frac{1}{2} \langle v_{k+1} - v_k, v_k \rangle + \frac{1}{4} \|v_{k+1} - v_k\|^2 \\
&\quad + (1 + \sqrt{\mu s}) \left( \langle \nabla f(x_k), x_{k+1} - x_k \rangle + \frac{L}{2} \|x_{k+1} - x_k\|^2 \right) \\
&\quad - \frac{1}{2} \langle (1 + \sqrt{\mu s}) \sqrt{s} \nabla f(x_k), 2\sqrt{\mu}(x_k - x^*) + v_k + \sqrt{s} \nabla f(x_k) \rangle \\
&\quad + \frac{1}{4} \|(1 + \sqrt{\mu s}) \sqrt{s} \nabla f(x_k)\|^2 \\
&= -\sqrt{\mu s} \|v_k\|^2 - \frac{1}{2} \langle \nabla f(x_{k+1}) - \nabla f(x_k), x_{k+1} - x_k \rangle \\
&\quad + \frac{1}{4} \|2\sqrt{\mu s} v_k + \sqrt{s} (\nabla f(x_{k+1}) - \nabla f(x_k)) + \sqrt{s} (1 + \sqrt{\mu s}) \nabla f(x_k)\|^2 \\
&\quad + \frac{(1 + \sqrt{\mu s}) s L}{2} \|v_k\|^2 - \sqrt{\mu s} (1 + \sqrt{\mu s}) \langle \nabla f(x_k), x_k - x^* \rangle \\
&\quad - \frac{(1 + \sqrt{\mu s}) s}{2} \|\nabla f(x_k)\|^2 + \frac{1}{4} (1 + \sqrt{\mu s})^2 s \|\nabla f(x_k)\|^2.
\end{aligned}$$

436

Using the Cauchy-Schwartz inequality

$$\begin{aligned}
&\|2\sqrt{\mu s} v_k + \sqrt{s} (\nabla f(x_{k+1}) - \nabla f(x_k)) + \sqrt{s} (1 + \sqrt{\mu s}) \nabla f(x_k)\|^2 \\
&\leq 12\mu s \|v_k\|^2 + 3s \|\nabla f(x_{k+1}) - \nabla f(x_k)\|^2 + 3s (1 + \sqrt{\mu s})^2 \|\nabla f(x_0)\|^2,
\end{aligned}$$

437

the iterate difference for the Lyapunov function can be calculated as

$$\begin{aligned}
&\mathcal{E}(k+1) - \mathcal{E}(k) \\
&\leq -\sqrt{\mu s} \left( \|v_k\|^2 + (1 + \sqrt{\mu s}) \langle \nabla f(x_k), x_k - x^* \rangle + \frac{s}{2} \|\nabla f(x_k)\|^2 \right) \\
&\quad - \frac{1}{2} \langle \nabla f(x_{k+1}) - \nabla f(x_k), x_{k+1} - x_k \rangle + \frac{3s}{4} \|\nabla f(x_{k+1}) - \nabla f(x_k)\|^2 \\
&\quad + \left( 3\mu s + \frac{(1 + \sqrt{\mu s}) s L}{2} \right) \|v_k\|^2 + \left[ (1 + \sqrt{\mu s})^2 - \frac{1}{2} \right] s \|\nabla f(x_k)\|^2.
\end{aligned}$$

438

Furthermore, combined with the basic inequality for  $f \in \mathcal{S}_{\mu, L}^1(\mathbb{R}^n)$ ,

$$\begin{cases} \|\nabla f(x_{k+1}) - \nabla f(x_k)\|^2 \leq L \langle \nabla f(x_{k+1}) - \nabla f(x_k), x_{k+1} - x_k \rangle \\ \|\nabla f(x_k)\|^2 \leq L \langle \nabla f(x_k), x_k - x^* \rangle, \end{cases}$$

439

the iterate difference for the Lyapunov function can be calculated as

$$\begin{aligned}
&\mathcal{E}(k+1) - \mathcal{E}(k) \\
&\leq -\frac{\sqrt{\mu s}}{2} \left( \|v_k\|^2 + (1 + \sqrt{\mu s}) \langle \nabla f(x_k), x_k - x^* \rangle + \frac{s}{2} \|\nabla f(x_k)\|^2 \right) \\
&\quad - \left( \frac{1}{2L} - \frac{3s}{4} \right) \|\nabla f(x_{k+1}) - \nabla f(x_k)\|^2 \\
&\quad - \left( \frac{\sqrt{\mu s}}{2} - 3\mu s - \frac{(1 + \sqrt{\mu s}) s L}{2} \right) \|v_k\|^2 \\
&\quad - \left[ \frac{\sqrt{\mu s} (1 + \sqrt{\mu s})}{2L} - \left( \frac{1}{2} + \sqrt{\mu s} \right) (1 + \sqrt{\mu s}) s \right] \|\nabla f(x_k)\|^2.
\end{aligned}$$

440

Simple calculation tells us when the step size satisfies  $s \leq \mu/(100L^2)$ , we have

$$\begin{aligned}
&\mathcal{E}(k+1) - \mathcal{E}(k) \\
&\leq -\frac{\sqrt{\mu s}}{2} \left( \|v_k\|^2 + (1 + \sqrt{\mu s}) \langle \nabla f(x_k), x_k - x^* \rangle + \frac{s}{2} \|\nabla f(x_k)\|^2 \right).
\end{aligned}$$

441

Furthermore, taking the Cauchy-Schwartz inequality

$$\begin{aligned} & \|2\sqrt{\mu}(x_{k+1} - x^*) + v_k + \sqrt{s}\nabla f(x_k)\|^2 \\ & \leq 3 \left( 4\mu \|x_k - x^*\|^2 + \|v_k\|^2 + s \|\nabla f(x_k)\|^2 \right), \end{aligned}$$

442

we can obtain the final estimate for the iterate difference

$$\mathcal{E}(k+1) - \mathcal{E}(k) \leq -\frac{\sqrt{\mu s}}{8} \mathcal{E}(k).$$

443

Hence, the proof is complete.

444

(c) The Lyapunov function is

$$\begin{aligned} \mathcal{E}(k) &= \frac{1}{4} \|v_k\|^2 + (1 + \sqrt{\mu s}) (f(x_k) - f(x^*)) \\ &\quad + \frac{1}{4} \|2\sqrt{\mu}(x_k - x^*) + v_k + \sqrt{s}\nabla f(x_k)\|^2 \end{aligned}$$

445

With the Cauchy-Schwartz inequality

$$\begin{aligned} & \|2\sqrt{\mu}(x_k - x^*) + v_k + \sqrt{s}\nabla f(x_k)\|^2 \\ & \leq 3 \left( 4\mu \|x_k - x^*\|^2 + \|v_k\|^2 + s \|\nabla f(x_k)\|^2 \right), \end{aligned}$$

446

and the basic inequality for  $f \in \mathcal{S}_{\mu, L}^1(\mathbb{R}^n)$

$$\begin{cases} f(x_{k+1}) - f(x_k) \leq \langle \nabla f(x_{k+1}), x_{k+1} - x_k \rangle \\ f(x^*) \geq f(x_{k+1}) + \langle \nabla f(x_{k+1}), x^* - x_{k+1} \rangle + \frac{\mu}{2} \|x_{k+1} - x^*\|^2 \\ \langle \nabla f(x_{k+1}) - \nabla f(x_k), x_{k+1} - x_k \rangle \geq \mu \|x_{k+1} - x_k\|^2 \geq 0, \end{cases}$$

447

we can calculate the iterate difference

$$\begin{aligned} & \mathcal{E}(k+1) - \mathcal{E}(k) \\ &= \frac{1}{4} \langle v_{k+1} - v_k, v_{k+1} + v_k \rangle + (1 + \sqrt{\mu s}) (f(x_{k+1}) - f(x_k)) \\ &\quad + \frac{1}{4} \langle 2\sqrt{\mu}(x_{k+1} - x_k) + v_{k+1} - v_k + \sqrt{s}(\nabla f(x_{k+1}) - \nabla f(x_k)) \\ &\quad 2\sqrt{\mu}(x_{k+1} + x_k - 2x^*) + v_{k+1} + v_k + \sqrt{s}(\nabla f(x_{k+1}) + \nabla f(x_k)) \rangle \\ &\leq \frac{1}{2} \langle v_{k+1} - v_k, v_{k+1} \rangle + (1 + \sqrt{\mu s}) \langle \nabla f(x_{k+1}), x_{k+1} - x_k \rangle \\ &\quad - \frac{1}{2} \langle (1 + \sqrt{\mu s}) \sqrt{s} \nabla f(x_{k+1}), 2\sqrt{\mu}(x_{k+1} - x^*) + v_{k+1} + \sqrt{s} \nabla f(x_{k+1}) \rangle \\ &\quad - \frac{1}{4} \|v_{k+1} - v_k\|^2 - \frac{1}{4} \|(1 + \sqrt{\mu s}) \sqrt{s} \nabla f(x_{k+1})\|^2 \\ &\leq -\sqrt{\mu s} \left( \|v_{k+1}\|^2 + (1 + \sqrt{\mu s}) \langle \nabla f(x_{k+1}), x_{k+1} - x^* \rangle + \frac{s}{2} \|\nabla f(x_{k+1})\|^2 \right) \\ &\quad - \frac{1}{2} \langle \nabla f(x_{k+1}) - \nabla f(x_k), x_{k+1} - x_k \rangle - \frac{s}{2} \|\nabla f(x_{k+1})\|^2 \\ &\leq -\frac{\sqrt{\mu s}}{4} \mathcal{E}(k+1). \end{aligned}$$

448

Hence, the proof is complete.

449

## B.2 Proof of Theorem 3.2

450

Here, we first describe and prove Theorem B.2 below. Then we complete the proof of Theorem 3.2 by viewing it as a special case of Theorem B.2.

451

452

**Theorem B.2** (Discretization of heavy-ball ODE — General). For any  $f \in \mathcal{S}_{\mu, L}^1(\mathbb{R}^n)$ , the following conclusions hold:

453

454 (a) Taking  $0 < s \leq \mu/(16L^2)$ , the symplectic Euler scheme satisfies

$$f(x_k) - f(x^*) \leq \left( \frac{(3 + 8\sqrt{\mu s} + 8\mu s) sL}{(1 + \sqrt{\mu s})^2} + \frac{2\mu}{L} + \frac{1 + \sqrt{\mu s}}{2} \right) \frac{L \|x_0 - x^*\|^2}{\left(1 + \frac{\sqrt{\mu s}}{4}\right)^k}. \quad (\text{B.4})$$

455 (b) Taking  $0 < s \leq \mu/(36L^2)$ , the explicit Euler scheme satisfies

$$\begin{aligned} f(x_k) - f(x^*) &\leq \left( \frac{3sL}{(1 + \sqrt{\mu s})^2} + \frac{2\mu}{L} + \frac{1 + \sqrt{\mu s}}{2} \right) L \|x_0 - x^*\|^2 \left(1 - \frac{\sqrt{\mu s}}{8}\right)^k. \end{aligned} \quad (\text{B.5})$$

456 (c) Taking  $0 < s \leq 1/L$ , the implicit Euler scheme satisfies

$$f(x_k) - f(x^*) \leq \left( \frac{3sL}{(1 + \sqrt{\mu s})^2} + \frac{2\mu}{L} + \frac{1 + \sqrt{\mu s}}{2} \right) \frac{L \|x_0 - x^*\|^2}{\left(1 + \frac{\sqrt{\mu s}}{4}\right)^k}. \quad (\text{B.6})$$

## 457 **Proof of Theorem B.2**

458 (a) The Lyapunov function is

$$\mathcal{E}(k) = \frac{1}{4} \|v_k\|^2 + \frac{1}{4} \|2\sqrt{\mu}(x_k - x^*) + v_k\|^2 + (1 + \sqrt{\mu s}) (f(x_k) - f(x^*)).$$

459 With the Cauchy-Schwartz inequality

$$\|2\sqrt{\mu}(x_k - x^*) + v_k\|^2 \leq 2 \left( 4\mu \|x_k - x^*\|^2 + \|v_k\|^2 \right),$$

460 and the basic inequality for  $f \in \mathcal{S}_{\mu, L}^1(\mathbb{R}^n)$

$$\begin{cases} f(x_{k+1}) - f(x_k) \leq \langle \nabla f(x_{k+1}), x_{k+1} - x_k \rangle \\ f(x^*) \geq f(x_{k+1}) + \langle \nabla f(x_{k+1}), x^* - x_{k+1} \rangle + \frac{\mu}{2} \|x_{k+1} - x^*\|^2, \end{cases}$$

461 then we can calculate the iterative difference

$$\begin{aligned} &\mathcal{E}(k+1) - \mathcal{E}(k) \\ &= \frac{1}{4} \langle v_{k+1} - v_k, v_{k+1} + v_k \rangle + (1 + \sqrt{\mu s}) (f(x_{k+1}) - f(x_k)) \\ &\quad + \frac{1}{4} \langle 2\sqrt{\mu}(x_{k+1} - x_k) + v_{k+1} - v_k, 2\sqrt{\mu}(x_{k+1} + x_k - 2x^*) + v_{k+1} + v_k \rangle \\ &\leq \frac{1}{2} \langle v_{k+1} - v_k, v_{k+1} \rangle + (1 + \sqrt{\mu s}) \langle \nabla f(x_{k+1}), x_{k+1} - x_k \rangle \\ &\quad + \frac{1}{2} \langle 2\sqrt{\mu}(x_{k+1} - x_k) + v_{k+1} - v_k, 2\sqrt{\mu}(x_{k+1} - x^*) + v_{k+1} \rangle \\ &\quad - \frac{1}{4} \|v_{k+1} - v_k\|^2 - \frac{1}{4} \|2\sqrt{\mu}(x_{k+1} - x_k) + v_{k+1} - v_k\|^2 \\ &\leq -\sqrt{\mu s} \left[ \|v_{k+1}\|^2 + (1 + \sqrt{\mu s}) \langle \nabla f(x_{k+1}), x_{k+1} - x^* \rangle \right] \\ &\leq -\sqrt{\mu s} \left[ \|v_{k+1}\|^2 + (1 + \sqrt{\mu s}) (f(x) - f(x^*)) + \frac{\mu}{2} \|x_{k+1} - x^*\|^2 \right] \\ &\leq -\frac{\sqrt{\mu s}}{4} \mathcal{E}(k+1). \end{aligned}$$

462 Hence, the proof is complete.

463 (b) The Lyapunov function is

$$\mathcal{E}(k) = \frac{1}{4} \|v_k\|^2 + \frac{1}{4} \|2\sqrt{\mu}(x_k - x^*) + v_k\|^2 + (1 + \sqrt{\mu s}) (f(x_k) - f(x^*)).$$

464

With the Cauchy-Schwartz inequality

$$\|2\sqrt{\mu}(x_k - x^*) + v_k\|^2 \leq 2 \left( 4\mu \|x_k - x^*\|^2 + \|v_k\|^2 \right),$$

465

and the basic inequality for  $f \in \mathcal{S}_{\mu,L}^1(\mathbb{R}^n)$

$$\begin{cases} f(x_{k+1}) - f(x_k) \leq \langle \nabla f(x_k), x_{k+1} - x_k \rangle + \frac{L}{2} \|x_{k+1} - x_k\|^2 \\ f(x^*) \geq f(x_{k+1}) + \langle \nabla f(x_{k+1}), x^* - x_{k+1} \rangle + \frac{\mu}{2} \|x^* - x_{k+1}\|^2, \end{cases}$$

466

then we calculate the iterative difference

$$\begin{aligned} & \mathcal{E}(k+1) - \mathcal{E}(k) \\ &= \frac{1}{4} \langle v_{k+1} - v_k, v_{k+1} + v_k \rangle + (1 + \sqrt{\mu s}) (f(x_{k+1}) - f(x_k)) \\ & \quad + \frac{1}{4} \langle 2\sqrt{\mu}(x_{k+1} - x_k) + v_{k+1} - v_k, 2\sqrt{\mu}(x_{k+1} + x_k - 2x^*) + v_{k+1} + v_k \rangle \\ &\leq \frac{1}{2} \langle v_{k+1} - v_k, v_k \rangle + (1 + \sqrt{\mu s}) \langle \nabla f(x_k), x_{k+1} - x_k \rangle \\ & \quad + \frac{(1 + \sqrt{\mu s}) L}{2} \|x_{k+1} - x_k\|^2 \\ & \quad + \frac{1}{2} \langle 2\sqrt{\mu}(x_{k+1} - x_k) + v_{k+1} - v_k, 2\sqrt{\mu}(x_k - x^*) + v_k \rangle \\ & \quad + \frac{1}{4} \|v_{k+1} - v_k\|^2 + \frac{1}{4} \|2\sqrt{\mu}(x_{k+1} - x_k) + v_{k+1} - v_k\|^2 \\ &\leq -\sqrt{\mu s} \left( \|v_k\|^2 + (1 + \sqrt{\mu s}) \langle \nabla f(x_k), x_k - x^* \rangle \right) \\ & \quad + \frac{(1 + \sqrt{\mu s}) L s}{2} \|v_k\|^2 + \frac{s}{4} \|2\sqrt{\mu}v_k + \nabla f(x_k)\|^2 + \frac{s}{4} \|\nabla f(x_k)\|^2 \\ &\leq -\frac{\sqrt{\mu s}}{2} \left( \|v_k\|^2 + f(x_k) - f(x^*) + \frac{\mu}{2} \|x_k - x^*\|^2 \right) \\ & \quad - \frac{\sqrt{\mu s}}{2} \left( \|v_k\|^2 + \frac{(1 + \sqrt{\mu s})}{L} \|\nabla f(x_k)\|^2 \right) \\ & \quad + s \left( 2\mu + \frac{L(1 + \sqrt{\mu s})}{2} \right) \|v_k\|^2 + \frac{3s}{4} \|\nabla f(x_k)\|^2. \end{aligned}$$

467

Since  $\mu \leq L$ , then the step size  $s \leq \mu/(36L^2)$  satisfies it. Hence, the proof is complete.

468

(c) The Lyapunov function is constructed as

$$\mathcal{E}(k) = \frac{1}{4} \|v_k\|^2 + \frac{1}{4} \|2\sqrt{\mu}(x_{k+1} - x^*) + v_k\|^2 + (1 + \sqrt{\mu s}) (f(x_k) - f(x^*)).$$

469

With Cauchy-Schwartz inequality

$$\begin{aligned} \|2\sqrt{\mu}(x_{k+1} - x^*) + v_k\|^2 &= \|2\sqrt{\mu}(x_k - x^*) + (1 + 2\sqrt{\mu s})v_k\|^2 \\ &\leq 2 \left( 4\mu \|x_k - x^*\|^2 + (1 + 2\sqrt{\mu s})^2 \|v_k\|^2 \right), \end{aligned}$$

470

and the basic inequality for  $f \in \mathcal{S}_{\mu,L}^1(\mathbb{R}^n)$

$$\begin{cases} f(x_{k+1}) - f(x_k) \leq \langle \nabla f(x_{k+1}), x_{k+1} - x_k \rangle - \frac{1}{2L} \|\nabla f(x_{k+1}) - \nabla f(x_k)\|^2 \\ f(x^*) \geq f(x_{k+1}) + \langle \nabla f(x_{k+1}), x^* - x_{k+1} \rangle + \frac{\mu}{2} \|x^* - x_{k+1}\|^2, \end{cases}$$

471

then we calculate the iterative difference

$$\mathcal{E}(k+1) - \mathcal{E}(k)$$

$$\begin{aligned}
&= \frac{1}{4} \langle v_{k+1} - v_k, v_{k+1} + v_k \rangle + (1 + \sqrt{\mu s}) (f(x_{k+1}) - f(x_k)) \\
&\quad + \frac{1}{4} \langle 2\sqrt{\mu}(x_{k+2} - x_{k+1}) + v_{k+1} - v_k, 2\sqrt{\mu}(x_{k+2} + x_{k+1} - 2x^*) + v_{k+1} + v_k \rangle \\
&\leq \frac{1}{2} \langle v_{k+1} - v_k, v_{k+1} \rangle - \frac{1}{4} \|v_{k+1} - v_k\|^2 \\
&\quad + (1 + \sqrt{\mu s}) \langle \nabla f(x_{k+1}), x_{k+1} - x_k \rangle - \frac{(1 + \sqrt{\mu s})}{2L} \|\nabla f(x_{k+1}) - \nabla f(x_k)\|^2 \\
&\quad + \frac{1}{2} \langle -\sqrt{s}(1 + \sqrt{\mu s}) \nabla f(x_{k+1}), 2\sqrt{\mu}(x_{k+2} - x^*) + v_{k+1} \rangle \\
&\quad - \frac{1}{4} \|\sqrt{s}(1 + \sqrt{\mu s}) \nabla f(x_{k+1})\|^2 \\
&\leq -\sqrt{\mu s} \left( \|v_{k+1}\|^2 + (1 + \sqrt{\mu s}) \langle \nabla f(x_{k+1}), x_{k+1} - x^* \rangle \right) \\
&\quad - \frac{\sqrt{s}(1 + \sqrt{\mu s})}{2} \langle \nabla f(x_{k+1}), (1 + 2\sqrt{\mu s})v_{k+1} - v_k \rangle \\
&\quad - \frac{(1 + \sqrt{\mu s})}{2L} \|\nabla f(x_{k+1}) - \nabla f(x_k)\|^2 - \frac{1}{4} \|v_{k+1} - v_k + \sqrt{s} \nabla f(x_{k+1})\|^2 \\
&\leq -\sqrt{\mu s} \left[ \|v_{k+1}\|^2 + \frac{1}{4} (1 + \sqrt{\mu s}) (f(x_{k+1}) - f(x^*)) + \frac{\mu}{2} \|x_{k+1} - x^*\|^2 \right] \\
&\quad - \frac{(1 + \sqrt{\mu s})}{4} \left[ 3\sqrt{\mu s} (f(x_{k+1}) - f(x^*)) - 2s \|\nabla f(x_{k+1})\|^2 \right]
\end{aligned}$$

472 Since  $\mu \leq L$ , then the step size  $s \leq \mu/(16L^2)$  satisfies it. Hence, the proof is complete with  
473 some basic calculations.

## 474 C Technical Analysis and Proofs for Section 4

### 475 C.1 Technical details for numerical scheme of ODE (4.3)

476 **Proof of Theorem 4.1 (b)** The Lyapunov function is constructed as

$$\mathcal{E}(k) = s(k+2)(k+3)(f(x_k) - f(x^*)) + \frac{1}{2} \|2(x_k - x^*) + (k+1)\sqrt{s}(v_k + \sqrt{s}\nabla f(x_k))\|^2.$$

477 With the basic inequality for  $f \in \mathcal{F}_L^1(\mathbb{R}^n)$

$$\begin{cases} f(x_{k+1}) - f(x_k) \leq \langle \nabla f(x_{k+1}), x_{k+1} - x_k \rangle \\ f(x_{k+1}) - f(x^*) \leq \langle \nabla f(x_{k+1}), x_{k+1} - x^* \rangle, \end{cases}$$

478 we can calculate the iterative difference as

$$\begin{aligned}
&\mathcal{E}(k+1) - \mathcal{E}(k) \\
&= s(k+2)(k+3)(f(x_{k+1}) - f(x_k)) + s(2k+6)(f(x_{k+1}) - f(x^*)) \\
&\quad + \frac{1}{2} \langle 2(x_{k+1} - x_k) - \sqrt{s}(k+1)(v_k + \sqrt{s}\nabla f(x_k)) \\
&\quad \quad + \sqrt{s}(k+2)(v_{k+1} + \sqrt{s}\nabla f(x_{k+1})), \\
&\quad \quad 2(x_{k+1} + x_k - 2x^*) + \sqrt{s}(k+1)(v_k + \sqrt{s}\nabla f(x_k)) \\
&\quad \quad + \sqrt{s}(k+2)(v_{k+1} + \sqrt{s}\nabla f(x_{k+1})) \rangle \\
&= s(k+2)(k+3)(f(x_{k+1}) - f(x_k)) + s(2k+6)(f(x_{k+1}) - f(x^*)) \\
&\quad - \langle s(k+3)\nabla f(x_{k+1}), \\
&\quad \quad 2(x_{k+1} - x^*) + \sqrt{s}(k+2)(v_{k+1} + \sqrt{s}\nabla f(x_{k+1})) \rangle \\
&\quad - \frac{s^2}{2} (k+3)^2 \|\nabla f(x_{k+1})\|^2
\end{aligned}$$

$$\leq -\frac{s^2}{2} (k+3) (3k+7) \|\nabla f(x_{k+1})\|^2.$$

479 Hence, the proof is complete with some basic calculations.

480 **Technical analysis of explicit Euler of ODE (4.3)** The Lyapunov function is

$$\mathcal{E}(k) = s(k-2)(k+1)(f(x_k) - f(x^*)) + \frac{1}{2} \|2(x_k - x^*) + (k-1)\sqrt{s}(v_k + \sqrt{s}\nabla f(x_k))\|^2.$$

481 Then we calculate the iterative difference as

$$\begin{aligned} & \mathcal{E}(k+1) - \mathcal{E}(k) \\ &= s(k-1)(k+2)(f(x_{k+1}) - f(x_k)) + 2sk(f(x_k) - f(x^*)) \\ & \quad + \frac{1}{2} \langle 2(x_{k+1} - x_k) + \sqrt{s}k(v_{k+1} + \sqrt{s}\nabla f(x_{k+1})) \\ & \quad \quad - \sqrt{s}(k-1)(v_k + \sqrt{s}\nabla f(x_k)), \\ & \quad \quad 2(x_{k+1} + x_k - 2x^*) + \sqrt{s}k(v_{k+1} + \sqrt{s}\nabla f(x_{k+1})) \\ & \quad \quad + \sqrt{s}(k-1)(v_k + \sqrt{s}\nabla f(x_k)) \rangle \\ &= s(k-1)(k+2)(f(x_{k+1}) - f(x_k)) + 2sk(f(x_k) - f(x^*)) \\ & \quad - \langle s(k+2)\nabla f(x_k), 2(x_k - x^*) + \sqrt{s}(k-1)(v_k + \sqrt{s}\nabla f(x_k)) \rangle \\ & \quad + \frac{s^2}{2} (k+2)^2 \|\nabla f(x_k)\|^2. \end{aligned}$$

482 • If we take the following basic inequality for  $f \in \mathcal{F}_L^1(\mathbb{R}^n)$

$$\begin{cases} f(x_{k+1}) - f(x_k) \leq \langle \nabla f(x_k), x_{k+1} - x_k \rangle + \frac{L}{2} \|x_{k+1} - x_k\|^2 \\ f(x_k) - f(x^*) \leq \langle \nabla f(x_k), x_k - x^* \rangle, \end{cases}$$

483 we can obtain the following estimate

$$\begin{aligned} & \mathcal{E}(k+1) - \mathcal{E}(k) \\ & \leq \frac{Ls^2}{2} (k-1)(k+2) \|v_k\|^2 - 4s(f(x_k) - f(x^*)) - \frac{s^2}{2} (k+2)(k-4) \|\nabla f(x_k)\|^2, \end{aligned}$$

484 which cannot guarantee the right-hand side of the inequality non-positive.

485 • If we take the following basic inequality for  $f \in \mathcal{F}_L^1(\mathbb{R}^n)$

$$\begin{cases} f(x_{k+1}) - f(x_k) \leq \langle \nabla f(x_{k+1}), x_{k+1} - x_k \rangle - \frac{1}{2L} \|\nabla f(x_{k+1}) - \nabla f(x_k)\|^2 \\ f(x_k) - f(x^*) \leq \langle \nabla f(x_k), x_k - x^* \rangle, \end{cases}$$

486 we can obtain the following estimate

$$\begin{aligned} & \mathcal{E}(k+1) - \mathcal{E}(k) \\ & \leq \frac{Ls(k-1)(k+2)}{2} \left( \langle \nabla f(x_{k+1}) - \nabla f(x_k), x_{k+1} - x_k \rangle \right. \\ & \quad \left. - \frac{1}{2L} \|\nabla f(x_{k+1}) - \nabla f(x_k)\|^2 \right) \\ & \quad - 4s(f(x_k) - f(x^*)) - \frac{s^2}{2} (k+2)(k-4) \|\nabla f(x_k)\|^2, \end{aligned}$$

487 which cannot guarantee the right-hand side of the inequality non-positive.



488 **C.2 Technical details for standard numerical schemes**

489 Standard Euler discretization of ODE (4.1), with initial  $x_0$  and  $v_0 = -\sqrt{s}\nabla f(x_0)$ , are shown as  
 490 below. **Euler scheme of (4.1): (S), (E) and (I) respectively**

$$\begin{aligned}
 \text{(S)} \quad & \begin{cases} x_{k+1} - x_k = \sqrt{s}v_k \\ v_{k+1} - v_k = -\frac{3v_{k+1}}{k+1} - \sqrt{s}(\nabla f(x_{k+1}) - \nabla f(x_k)) - \sqrt{s}\left(\frac{2k+5}{2k+2}\right)\nabla f(x_{k+1}). \end{cases} \\
 \text{(E)} \quad & \begin{cases} x_{k+1} - x_k = \sqrt{s}v_k \\ v_{k+1} - v_k = -\frac{3v_k}{k} - \sqrt{s}(\nabla f(x_{k+1}) - \nabla f(x_k)) - \sqrt{s}\left(\frac{2k+3}{2k}\right)\nabla f(x_k). \end{cases} \\
 \text{(I)} \quad & \begin{cases} x_{k+1} - x_k = \sqrt{s}v_{k+1} \\ v_{k+1} - v_k = -\frac{3v_{k+1}}{k+1} - \sqrt{s}(\nabla f(x_{k+1}) - \nabla f(x_k)) - \sqrt{s}\left(\frac{2k+5}{2k+2}\right)\nabla f(x_{k+1}). \end{cases}
 \end{aligned}$$

491 **Technical analysis of symplectic scheme of ODE (4.1)** The Lyapunov function is

$$\mathcal{E}(k) = s(k+1)\left(k + \frac{3}{2}\right)(f(x_k) - f(x^*)) + \frac{1}{2}\|2(x_{k+1} - x^*) + (k+1)\sqrt{s}(v_k + \sqrt{s}\nabla f(x_k))\|^2.$$

492 Then we calculate the iterative difference as

$$\begin{aligned}
 & \mathcal{E}(k+1) - \mathcal{E}(k) \\
 &= s(k+1)\left(k + \frac{3}{2}\right)(f(x_{k+1}) - f(x_k)) + s\left(2k + \frac{7}{2}\right)(f(x_{k+1}) - f(x^*)) \\
 & \quad + \frac{1}{2}\langle 2(x_{k+2} - x_{k+1}) - \sqrt{s}(k+1)(v_k + \sqrt{s}\nabla f(x_k)) \\
 & \quad \quad + \sqrt{s}(k+2)(v_{k+1} + \sqrt{s}\nabla f(x_{k+1})) \\
 & \quad \quad 2(x_{k+2} + x_{k+1} - 2x^*) + \sqrt{s}(k+1)(v_k + \sqrt{s}\nabla f(x_k)) \\
 & \quad \quad + \sqrt{s}(k+2)(v_{k+1} + \sqrt{s}\nabla f(x_{k+1})) \rangle \\
 &= s(k+1)\left(k + \frac{3}{2}\right)(f(x_{k+1}) - f(x_k)) + s\left(2k + \frac{7}{2}\right)(f(x_{k+1}) - f(x^*)) \\
 & \quad - \left\langle s\left(k + \frac{3}{2}\right)\nabla f(x_{k+1}), 2(x_{k+2} - x^*) + \sqrt{s}(k+2)(v_{k+1} + \sqrt{s}\nabla f(x_{k+1})) \right\rangle \\
 & \quad - \frac{s^2}{2}\left(k + \frac{3}{2}\right)^2\|\nabla f(x_{k+1})\|^2.
 \end{aligned}$$

493 Now we hope to utilize the basic inequality for  $f \in \mathcal{F}_L^1(\mathbb{R}^n)$  to make the right side of equality no  
 494 more than zero. Taking the following inequalities

$$\begin{cases} f(x_{k+1}) - f(x_k) \leq \langle \nabla f(x_{k+1}), x_{k+1} - x_k \rangle - \frac{1}{2L}\|\nabla f(x_{k+1}) - \nabla f(x_k)\|^2 \\ f(x_{k+1}) - f(x^*) \leq \langle \nabla f(x_{k+1}), x_{k+1} - x^* \rangle, \end{cases}$$

495 we can obtain the iterative difference is

$$\begin{aligned}
 & \mathcal{E}(k+1) - \mathcal{E}(k) \\
 & \leq \frac{s}{2}(f(x_{k+1}) - f(x^*)) - \frac{s^2}{2}\left(k + \frac{3}{2}\right)\left(3k + \frac{7}{2}\right)\|\nabla f(x_{k+1})\|^2 \\
 & \quad - \frac{s}{2L}(k+1)\left(k + \frac{3}{2}\right)\|\nabla f(x_{k+1}) - \nabla f(x_k)\|^2 \\
 & \quad + s^2(k+1)\left(k + \frac{3}{2}\right)\langle \nabla f(x_{k+1}), \nabla f(x_{k+1}) - \nabla f(x_k) \rangle
 \end{aligned}$$

$$\begin{aligned}
& +s^2 \left(k + \frac{3}{2}\right) \left(k + \frac{5}{2}\right) \|\nabla f(x_{k+1})\|^2 \\
& \leq \frac{s}{2} (f(x_{k+1}) - f(x^*)) - \frac{s^2}{2} \left(k + \frac{3}{2}\right) \left(k - \frac{3}{2} - Ls(k+1)\right) \|\nabla f(x_{k+1})\|^2.
\end{aligned}$$

496 Since there exists a non-negative term,  $\frac{s}{2} (f(x_{k+1}) - f(x^*))$ , we cannot guarantee the right-hand  
497 side of inequality is non-positive. Hence, the convergence cannot be proved by the above description.

498 **Technical analysis of explicit scheme of ODE (4.1)** The Lyapunov function is

$$\mathcal{E}(k) = s(k-2) \left(k - \frac{1}{2}\right) (f(x_k) - f(x^*)) + \frac{1}{2} \|2(x_k - x^*) + (k-1)\sqrt{s}(v_k + \sqrt{s}\nabla f(x_k))\|^2.$$

499 Then we calculate the iterative difference as

$$\begin{aligned}
& \mathcal{E}(k+1) - \mathcal{E}(k) \\
& = s(k-1) \left(k + \frac{1}{2}\right) (f(x_{k+1}) - f(x_k)) + s \left(2k - \frac{3}{2}\right) (f(x_k) - f(x^*)) \\
& \quad + \frac{1}{2} \langle 2(x_{k+1} - x_k) + \sqrt{s}k(v_{k+1} + \sqrt{s}\nabla f(x_{k+1})) \\
& \quad \quad - \sqrt{s}(k-1)(v_k + \sqrt{s}\nabla f(x_k)), \\
& \quad \quad 2(x_{k+1} + x_k - 2x^*) + \sqrt{s}k(v_{k+1} + \sqrt{s}\nabla f(x_{k+1})) \\
& \quad \quad + \sqrt{s}(k-1)(v_k + \sqrt{s}\nabla f(x_k)) \rangle \\
& = s(k-1) \left(k + \frac{1}{2}\right) (f(x_{k+1}) - f(x_k)) + s \left(2k - \frac{3}{2}\right) (f(x_k) - f(x^*)) \\
& \quad - \left\langle s \left(k + \frac{1}{2}\right) \nabla f(x_k), 2(x_k - x^*) + \sqrt{s}(k-1)(v_k + \sqrt{s}\nabla f(x_k)) \right\rangle \\
& \quad + \frac{s^2}{2} \left(k + \frac{1}{2}\right)^2 \|\nabla f(x_k)\|^2.
\end{aligned}$$

500 • If we take the following basic inequality for  $f \in \mathcal{F}_L^1(\mathbb{R}^n)$

$$\begin{cases} f(x_{k+1}) - f(x_k) \leq \langle \nabla f(x_k), x_{k+1} - x_k \rangle + \frac{L}{2} \|x_{k+1} - x_k\|^2 \\ f(x_k) - f(x^*) \leq \langle \nabla f(x_k), x_k - x^* \rangle, \end{cases}$$

501 we can obtain the following estimate

$$\begin{aligned}
\mathcal{E}(k+1) - \mathcal{E}(k) & \leq \frac{Ls^2}{2} (k-1) \left(k + \frac{1}{2}\right) \|v_k\|^2 \\
& \quad - \frac{5s}{2} (f(x_k) - f(x^*)) - \frac{s^2}{2} \left(k + \frac{1}{2}\right) \left(k - \frac{5}{2}\right) \|\nabla f(x_k)\|^2,
\end{aligned}$$

502 which cannot guarantee the right-hand side of the inequality non-positive.

503 • If we take the following basic inequality for  $f \in \mathcal{F}_L^1(\mathbb{R}^n)$

$$\begin{cases} f(x_{k+1}) - f(x_k) \leq \langle \nabla f(x_{k+1}), x_{k+1} - x_k \rangle - \frac{1}{2L} \|\nabla f(x_{k+1}) - \nabla f(x_k)\|^2 \\ f(x_k) - f(x^*) \leq \langle \nabla f(x_k), x_k - x^* \rangle, \end{cases}$$

504 we can obtain the following estimate

$$\begin{aligned}
& \mathcal{E}(k+1) - \mathcal{E}(k) \\
& \leq \frac{Ls(k-1)(2k+1)}{4} \left( \langle \nabla f(x_{k+1}) - \nabla f(x_k), x_{k+1} - x_k \rangle \right. \\
& \quad \left. - \frac{1}{2L} \|\nabla f(x_{k+1}) - \nabla f(x_k)\|^2 \right)
\end{aligned}$$

$$-\frac{5s}{2}(f(x_k) - f(x^*)) - \frac{s^2}{2}\left(k + \frac{1}{2}\right)\left(k - \frac{5}{2}\right)\|\nabla f(x_k)\|^2,$$

505 which cannot guarantee the right-hand side of the inequality non-positive.

506 **Technical analysis of implicit scheme of ODE (4.1)** The Lyapunov function is

$$\begin{aligned}\mathcal{E}(k) = s(k+2)\left(k + \frac{3}{2}\right)(f(x_k) - f(x^*)) \\ + \frac{1}{2}\|2(x_k - x^*) + (k+1)\sqrt{s}(v_k + \sqrt{s}\nabla f(x_k))\|^2.\end{aligned}$$

507 Then we can calculate the iterative difference as

$$\begin{aligned}\mathcal{E}(k+1) - \mathcal{E}(k) \\ = s(k+2)\left(k + \frac{3}{2}\right)(f(x_{k+1}) - f(x_k)) + s\left(2k + \frac{9}{2}\right)(f(x_{k+1}) - f(x^*)) \\ + \frac{1}{2}\langle 2(x_{k+1} - x_k) - \sqrt{s}(k+1)(v_k + \sqrt{s}\nabla f(x_k)) \\ + \sqrt{s}(k+2)(v_{k+1} + \sqrt{s}\nabla f(x_{k+1})), \\ 2(x_{k+1} + x_k - 2x^*) + \sqrt{s}(k+1)(v_k + \sqrt{s}\nabla f(x_k)) \\ + \sqrt{s}(k+2)(v_{k+1} + \sqrt{s}\nabla f(x_{k+1})) \rangle \\ = s(k+2)\left(k + \frac{3}{2}\right)(f(x_{k+1}) - f(x_k)) + s\left(2k + \frac{9}{2}\right)(f(x_{k+1}) - f(x^*)) \\ - \left\langle s\left(k + \frac{3}{2}\right)\nabla f(x_{k+1}), 2(x_{k+1} - x^*) + \sqrt{s}(k+2)(v_{k+1} + \sqrt{s}\nabla f(x_{k+1})) \right\rangle \\ - \frac{s^2}{2}\left(k + \frac{3}{2}\right)^2\|\nabla f(x_{k+1})\|^2.\end{aligned}$$

508 Now we hope to utilize the basic inequality for  $f \in \mathcal{F}_L^1(\mathbb{R}^n)$  to make the right side of equality no  
509 more than zero. Taking the following inequalities

$$\begin{cases} f(x_{k+1}) - f(x_k) \leq \langle \nabla f(x_{k+1}), x_{k+1} - x_k \rangle \\ f(x_{k+1}) - f(x^*) \leq \langle \nabla f(x_{k+1}), x_{k+1} - x^* \rangle, \end{cases}$$

510 we can obtain

$$\mathcal{E}(k+1) - \mathcal{E}(k) \leq \frac{3s}{2}(f(x_{k+1}) - f(x^*)) - \frac{s^2}{2}\left(k + \frac{3}{2}\right)\left(3k + \frac{7}{2}\right)\|\nabla f(x_{k+1})\|^2.$$

511 Although the negative term concludes the multiplier  $k^2$ , we cannot guarantee the right-hand side  
512 non-positive

## 513 **D Low-Resolution ODEs**

### 514 **D.1 Low-resolution ODE for strongly convex functions**

515 In this subsection, we discuss the numerical discretization of (2.3). We rewrite this ODE in a  
516 phase-space representation

$$\begin{cases} \dot{X} = V \\ \dot{V} = -2\sqrt{\mu}V - \nabla f(X) \end{cases}, \quad (\text{D.1})$$

517 with  $X(0) = x_0$  and  $V(0) = 0$ . We have the following theorem:

518 **Theorem D.1.** Let  $f \in \mathcal{S}_{\mu,L}^1(\mathbb{R}^n)$ . The solution  $X = X(t)$  to low-resolution ODE (2.3) satisfies

$$f(X) - f(x^*) \leq \frac{3L\|x_0 - x^*\|^2}{2}e^{-\frac{\sqrt{\mu}t}{4}}. \quad (\text{D.2})$$

519 *Proof.* The Lyapunov function is

$$\mathcal{E} = \frac{1}{4} \|\dot{X}\|^2 + \frac{1}{4} \|2\sqrt{\mu}(X - x^*) + \dot{X}\|^2 + f(X) - f(x^*).$$

520 Using the Cauchy-Schwartz inequality

$$\|2\sqrt{\mu}(X - x^*) + \dot{X}\|^2 \leq 2 \left( 4\mu \|X - x^*\|^2 + \|\dot{X}\|^2 \right),$$

521 and the basic inequality for  $f \in \mathcal{S}_{\mu,L}^1(\mathbb{R}^n)$

$$f(x^*) \geq f(X) + \langle \nabla f(X), x^* - x \rangle + \frac{\mu}{2} \|X - x^*\|^2,$$

522 we calculate the time derivative

$$\begin{aligned} \frac{d\mathcal{E}}{dt} &= \frac{1}{2} \left\langle \dot{X}, -2\sqrt{\mu}\dot{X} - \nabla f(X) \right\rangle + \frac{1}{2} \left\langle 2\sqrt{\mu}(X - x^*) + \dot{X}, -\nabla f(X) \right\rangle + \left\langle \nabla f(X), \dot{X} \right\rangle \\ &= -\sqrt{\mu} \left( \|\dot{X}\|^2 + \langle \nabla f(X), X - x^* \rangle \right) \\ &\leq -\sqrt{\mu} \left( \|\dot{X}\|^2 + f(X) - f(x^*) + \frac{\mu}{2} \|X - x^*\|^2 \right) \\ &\leq -\frac{\sqrt{\mu}}{4} \mathcal{E}. \end{aligned}$$

523 Hence, the proof is complete. □

524 We now analyze the standard Euler discretization of the low-resolution ODE (2.3). All of the  
525 following three Euler schemes take the same initial  $x_0$  and  $v_0 = 0$ .

526 **Euler Scheme of ODE (2.3): (S), (E) and (I) respectively**

$$\begin{aligned} \text{(S)} \quad & \begin{cases} x_{k+1} - x_k = \sqrt{s}v_k \\ v_{k+1} - v_k = -2\sqrt{\mu s}v_{k+1} - \sqrt{s}\nabla f(x_{k+1}). \end{cases} \\ \text{(E)} \quad & \begin{cases} x_{k+1} - x_k = \sqrt{s}v_k \\ v_{k+1} - v_k = -2\sqrt{\mu s}v_k - \sqrt{s}\nabla f(x_k). \end{cases} \\ \text{(I)} \quad & \begin{cases} x_{k+1} - x_k = \sqrt{s}v_{k+1} \\ v_{k+1} - v_k = -2\sqrt{\mu s}v_{k+1} - \sqrt{s}\nabla f(x_{k+1}). \end{cases} \end{aligned}$$

527 **Theorem D.2** (Discretization of Low-Resolution ODE — General). For any  $f \in \mathcal{S}_{\mu,L}^1(\mathbb{R}^n)$ , the  
528 following conclusions hold:

529 (a) Taking  $0 < s \leq \mu/(16L^2)$ , the symplectic Euler scheme satisfies

$$f(x_k) - f(x^*) \leq \frac{3L \|x_0 - x^*\|^2}{2 \left( 1 + \frac{\sqrt{\mu s}}{4} \right)^k}. \quad (\text{D.3})$$

530 (b) Taking  $0 < s \leq \mu/(25L^2)$ , the explicit Euler scheme satisfies

$$f(x_k) - f(x^*) \leq \frac{3L \|x_0 - x^*\|^2}{2} \left( 1 - \frac{\sqrt{\mu s}}{8} \right)^k. \quad (\text{D.4})$$

531 (c) Taking  $0 < s \leq 1/L$ , the implicit Euler scheme satisfies

$$f(x_k) - f(x^*) \leq \frac{3L \|x_0 - x^*\|^2}{2 \left( 1 + \frac{\sqrt{\mu s}}{4} \right)^k}. \quad (\text{D.5})$$

532 *Proof.* (a) The Lyapunov function is

$$\mathcal{E}(k) = \frac{1}{4} \|v_k\|^2 + \frac{1}{4} \|2\sqrt{\mu}(x_k - x^*) + v_k\|^2 + f(x_k) - f(x^*).$$

533 With the Cauchy-Schwartz inequality

$$\|2\sqrt{\mu}(x_k - x^*) + v_k\|^2 \leq 2 \left( 4\mu \|x_k - x^*\|^2 + \|v_k\|^2 \right),$$

534 and the basic inequality for  $f \in \mathcal{S}_{\mu,L}^1(\mathbb{R}^n)$

$$\begin{cases} f(x_{k+1}) - f(x_k) \leq \langle \nabla f(x_{k+1}), x_{k+1} - x_k \rangle \\ f(x^*) \geq f(x_{k+1}) + \langle \nabla f(x_{k+1}), x^* - x_{k+1} \rangle + \frac{\mu}{2} \|x_{k+1} - x^*\|^2, \end{cases}$$

535 we calculate the iterave difference

$$\begin{aligned} & \mathcal{E}(k+1) - \mathcal{E}(k) \\ &= \frac{1}{4} \langle v_{k+1} - v_k, v_{k+1} + v_k \rangle + f(x_{k+1}) - f(x_k) \\ & \quad + \frac{1}{4} \langle 2\sqrt{\mu}(x_{k+1} - x_k) + v_{k+1} - v_k, 2\sqrt{\mu}(x_{k+1} + x_k - 2x^*) + v_{k+1} + v_k \rangle \\ & \leq \frac{1}{2} \langle v_{k+1} - v_k, v_{k+1} \rangle + \langle \nabla f(x_{k+1}), x_{k+1} - x_k \rangle \\ & \quad + \frac{1}{2} \langle 2\sqrt{\mu}(x_{k+1} - x_k) + v_{k+1} - v_k, 2\sqrt{\mu}(x_{k+1} - x^*) + v_{k+1} \rangle \\ & \quad - \frac{1}{4} \|v_{k+1} - v_k\|^2 - \frac{1}{4} \|2\sqrt{\mu}(x_{k+1} - x_k) + v_{k+1} - v_k\|^2 \\ & \leq -\sqrt{\mu s} \left( \|v_{k+1}\|^2 + \langle \nabla f(x_{k+1}), x_{k+1} - x^* \rangle \right) \\ & \leq -\sqrt{\mu s} \left( \|v_{k+1}\|^2 + f(x_{k+1}) - f(x^*) + \frac{\mu}{2} \|x_{k+1} - x^*\|^2 \right) \\ & \leq -\frac{\sqrt{\mu s}}{4} \mathcal{E}(k+1). \end{aligned}$$

536 Hence, the proof is complete.

537 (b) The Lyapunov function is

$$\mathcal{E}(k) = \frac{1}{4} \|v_k\|^2 + \frac{1}{4} \|2\sqrt{\mu}(x_k - x^*) + v_k\|^2 + f(x_k) - f(x^*).$$

538 With the Cauchy-Schwartz inequality

$$\|2\sqrt{\mu}(x_k - x^*) + v_k\|^2 \leq 2 \left( 4\mu \|x_k - x^*\|^2 + \|v_k\|^2 \right),$$

539 and the basic inequality for  $f \in \mathcal{S}_{\mu,L}^1(\mathbb{R}^n)$

$$\begin{cases} f(x_{k+1}) - f(x_k) \leq \langle \nabla f(x_k), x_{k+1} - x_k \rangle + \frac{L}{2} \|x_{k+1} - x_k\|^2 \\ f(x^*) \geq f(x_{k+1}) + \langle \nabla f(x_{k+1}), x^* - x_{k+1} \rangle + \frac{\mu}{2} \|x^* - x_{k+1}\|^2, \end{cases}$$

540 we calculate the iterave difference

$$\begin{aligned} & \mathcal{E}(k+1) - \mathcal{E}(k) \\ &= \frac{1}{4} \langle v_{k+1} - v_k, v_{k+1} + v_k \rangle + f(x_{k+1}) - f(x_k) \\ & \quad + \frac{1}{4} \langle 2\sqrt{\mu}(x_{k+1} - x_k) + v_{k+1} - v_k, 2\sqrt{\mu}(x_{k+1} + x_k - 2x^*) + v_{k+1} + v_k \rangle \\ & \leq \frac{1}{2} \langle v_{k+1} - v_k, v_k \rangle + \langle \nabla f(x_k), x_{k+1} - x_k \rangle + \frac{L}{2} \|x_{k+1} - x_k\|^2 \end{aligned}$$

$$\begin{aligned}
& + \frac{1}{2} \langle 2\sqrt{\mu}(x_{k+1} - x_k) + v_{k+1} - v_k, 2\sqrt{\mu}(x_k - x^*) + v_k \rangle \\
& + \frac{1}{4} \|v_{k+1} - v_k\|^2 + \frac{1}{4} \|2\sqrt{\mu}(x_{k+1} - x_k) + v_{k+1} - v_k\|^2 \\
& \leq -\sqrt{\mu s} \left( \|v_k\|^2 + \langle \nabla f(x_k), x_k - x^* \rangle \right) \\
& + \frac{Ls}{2} \|v_k\|^2 + \frac{s}{4} \|2\sqrt{\mu}v_k + \nabla f(x_k)\|^2 + \frac{s}{4} \|\nabla f(x_k)\|^2 \\
& \leq -\frac{\sqrt{\mu s}}{2} \left( \|v_k\|^2 + f(x_k) - f(x^*) + \frac{\mu}{2} \|x_k - x^*\|^2 \right) \\
& - \frac{\sqrt{\mu s}}{2} \left( \|v_k\|^2 + \frac{1}{L} \|\nabla f(x_k)\|^2 \right) + s \left( 2\mu + \frac{L}{2} \right) \|v_k\|^2 + \frac{3s}{4} \|\nabla f(x_k)\|^2.
\end{aligned}$$

Since  $\mu \leq L$ , the step size  $s \leq \mu/(25L^2)$  satisfies it. Hence, the proof is complete after some basic calculations.

(c) The Lyapunov function is

$$\mathcal{E}(k) = \frac{1}{4} \|v_k\|^2 + \frac{1}{4} \|2\sqrt{\mu}(x_{k+1} - x^*) + v_k\|^2 + f(x_k) - f(x^*).$$

With the Cauchy-Schwartz inequality

$$\begin{aligned}
\|2\sqrt{\mu}(x_{k+1} - x^*) + v_k\|^2 &= \|2\sqrt{\mu}(x_k - x^*) + (1 + 2\sqrt{\mu s})v_k\|^2 \\
&\leq 2 \left( 4\mu \|x_k - x^*\|^2 + (1 + 2\sqrt{\mu s})^2 \|v_k\|^2 \right),
\end{aligned}$$

and the basic inequality for  $f \in \mathcal{S}_{\mu, L}^1(\mathbb{R}^n)$

$$\begin{cases} f(x_{k+1}) - f(x_k) \leq \langle \nabla f(x_{k+1}), x_{k+1} - x_k \rangle - \frac{1}{2L} \|\nabla f(x_{k+1}) - \nabla f(x_k)\|^2 \\ f(x^*) \geq f(x_{k+1}) + \langle \nabla f(x_{k+1}), x^* - x_{k+1} \rangle + \frac{\mu}{2} \|x^* - x_{k+1}\|^2, \end{cases}$$

we calculate the iterave difference

$$\begin{aligned}
& \mathcal{E}(k+1) - \mathcal{E}(k) \\
&= \frac{1}{4} \langle v_{k+1} - v_k, v_{k+1} + v_k \rangle + f(x_{k+1}) - f(x_k) \\
&+ \frac{1}{4} \langle 2\sqrt{\mu}(x_{k+2} - x_{k+1}) + v_{k+1} - v_k, 2\sqrt{\mu}(x_{k+2} + x_{k+1} - 2x^*) + v_{k+1} + v_k \rangle \\
&\leq \frac{1}{2} \langle v_{k+1} - v_k, v_{k+1} \rangle - \frac{1}{4} \|v_{k+1} - v_k\|^2 \\
&+ \langle \nabla f(x_{k+1}), x_{k+1} - x_k \rangle - \frac{1}{2L} \|\nabla f(x_{k+1}) - \nabla f(x_k)\|^2 \\
&+ \frac{1}{2} \langle -\sqrt{s}\nabla f(x_{k+1}), 2\sqrt{\mu}(x_{k+2} - x^*) + v_{k+1} \rangle - \frac{1}{4} \|\sqrt{s}\nabla f(x_{k+1})\|^2 \\
&\leq -\sqrt{\mu s} \left( \|v_{k+1}\|^2 + \langle \nabla f(x_{k+1}), x_{k+1} - x^* \rangle \right) \\
&- \frac{\sqrt{s}}{2} \langle \nabla f(x_{k+1}), (1 + 2\sqrt{\mu s})v_{k+1} - v_k \rangle \\
&- \frac{1}{2L} \|\nabla f(x_{k+1}) - \nabla f(x_k)\|^2 - \frac{1}{4} \|v_{k+1} - v_k + \sqrt{s}\nabla f(x_{k+1})\|^2 \\
&\leq -\sqrt{\mu s} \left[ \|v_{k+1}\|^2 + \frac{1}{4} (f(x_{k+1}) - f(x^*)) + \frac{\mu}{2} \|x_{k+1} - x^*\|^2 \right] \\
&- \frac{1}{4} \left[ 3\sqrt{\mu s} (f(x_{k+1}) - f(x^*)) - 2s \|\nabla f(x_{k+1})\|^2 \right].
\end{aligned}$$

Since  $\mu \leq L$ , the step size  $s \leq \mu/(16L^2)$  satisfies it. Hence, the proof is complete after some basic calculations.

□

550 **Corollary D.3** (Discretization of NAG-SC low-resolution ODE). For any  $f \in \mathcal{S}_{\mu,L}^1(\mathbb{R}^n)$ , the follow-  
 551 ing conclusions hold:

552 (a) Taking step size  $0s = \mu/(16L^2)$ , the symplectic Euler scheme satisfies

$$f(x_k) - f(x^*) \leq \frac{3L \|x_0 - x^*\|^2}{2 \left(1 + \frac{\mu}{16L}\right)^k}. \quad (\text{D.6})$$

553 (b) Taking step size  $s = \mu/(16L^2)$ , the explicit Euler scheme satisfies

$$f(x_k) - f(x^*) \leq \frac{3L \|x_0 - x^*\|^2}{2} \left(1 - \frac{\mu}{40L}\right)^k. \quad (\text{D.7})$$

554 (c) Taking step size  $s = 1/L$ , the implicit Euler scheme satisfies

$$f(x_k) - f(x^*) \leq \frac{3L \|x_0 - x^*\|^2}{2 \left(1 + \frac{1}{4} \sqrt{\frac{\mu}{L}}\right)^k}. \quad (\text{D.8})$$

555 **Remark D.1.** Compared with Theorem D.2 (a) – (c), just the Euler scheme of the low-resolution  
 556 ODE (2.3), both the explicit scheme and the symplectic scheme can retain the convergence rate from  
 557 the continuous version of Theorem D.1, when the step size  $s$  is of the order  $O(\mu/L^2)$ . Although  
 558 the explicit scheme is weaker than the symplectic scheme, it can preserve the rate to the same order  
 559 as the symplectic scheme. However, if the step size satisfies  $s = O(\mu/L^2)$ , the algorithm cannot  
 560 provide acceleration. There is no limitation on the step size  $s$  for the implicit Euler scheme, but in  
 561 general it is not practical for non-quadratic objective functions.

## 562 D.2 Low-resolution ODE for convex functions

563 In this subsection, we discuss the numerical discretization of (2.2). We rewrite it in a phase-space  
 564 representation:

$$\begin{cases} \dot{X} = V \\ \dot{V} = -\frac{3}{t}V - \nabla f(X), \end{cases}, \quad (\text{D.9})$$

565 with  $X(0) = x_0$  and  $V(0) = 0$ .

566 **Theorem D.4.** Let  $f \in \mathcal{F}_L^1(\mathbb{R}^n)$ . The solution  $X = X(t)$  to the low-resolution ODE (2.2) satisfies

$$\begin{cases} f(X) - f(x^*) \leq \frac{2 \|x_0 - x^*\|^2}{t^2} \\ \min_{0 \leq u \leq t} \|\nabla f(X(u))\|^2 \leq \frac{4L \|x_0 - x^*\|^2}{t^2}. \end{cases} \quad (\text{D.10})$$

567 Theorem D.4 is combined with Theorem 3 Su et al. [2016] and a further analysis about gradient norm  
 568 minimization in Shi et al. [2018]. The Lyapunov function is constructed in Su et al. [2016] as

$$\mathcal{E} = t^2 (f(X) - f(x^*)) + \frac{1}{2} \|2(X - x^*) + t\dot{X}\|^2. \quad (\text{D.11})$$

### 569 D.2.1 Symplectic Euler scheme

570 First, we utilize the symplectic Euler scheme with the initial  $x_0$  and  $v_0 = 0$ , as shown as following:

$$\begin{cases} x_{k+1} - x_k = \sqrt{s}v_k \\ v_{k+1} - v_k = -\frac{3}{k+1}v_{k+1} - \sqrt{s}\nabla f(x_{k+1}). \end{cases} \quad (\text{D.12})$$

571 **Technical analysis of symplectic scheme (D.12)** The Lyapunov function is

$$\mathcal{E}(k) = (k+1)^2 s (f(x_k) - f(x^*)) + \frac{1}{2} \|2(x_{k+1} - x^*) + (k+1)\sqrt{s}v_k\|^2.$$

572 Then we can calculate the iterate difference as

$$\begin{aligned} & \mathcal{E}(k+1) - \mathcal{E}(k) \\ &= (k+1)^2 s (f(x_{k+1}) - f(x_k)) + (2k+3)s (f(x_{k+1}) - f(x^*)) \\ & \quad + \frac{1}{2} \langle 2(x_{k+1} - x_k) + (k+2)\sqrt{s}v_{k+1} - (k+1)\sqrt{s}v_k, \\ & \quad 2(x_{k+1} + x_k - 2x^*) + (k+2)\sqrt{s}v_{k+1} + (k+1)\sqrt{s}v_k \rangle \\ &= (k+1)^2 s (f(x_{k+1}) - f(x_k)) + (2k+3)s (f(x_{k+1}) - f(x^*)) \\ & \quad - \langle (k+1)s\nabla f(x_{k+1}), 2(x_{k+1} - x^*) + (k+2)\sqrt{s}v_{k+1} \rangle \\ & \quad - \frac{1}{2} (k+1)^2 s^2 \|\nabla f(x_{k+1})\|^2. \end{aligned}$$

573 We hope to utilize the basic inequality for  $f \in \mathcal{F}_L^1(\mathbb{R}^n)$  to make the right-hand-side of the equality  
574 no more than zero. Based on the following inequalities:

$$\begin{cases} f(x_{k+1}) - f(x_k) \leq \langle \nabla f(x_{k+1}), x_{k+1} - x_k \rangle - \frac{1}{2L} \|\nabla f(x_{k+1}) - \nabla f(x_k)\|^2 \\ f(x_{k+1}) - f(x^*) \leq \langle \nabla f(x_{k+1}), x_{k+1} - x^* \rangle - \frac{1}{2L} \|\nabla f(x_{k+1})\|^2, \end{cases}$$

575 we obtain the following estimate:

$$\mathcal{E}(k+1) - \mathcal{E}(k) \leq \frac{1}{2} (k+1)^2 s^2 \|\nabla f(x_{k+1})\|^2 + s (f(x_{k+1}) - f(x^*)) - \frac{(k+1)s}{L} \|\nabla f(x_{k+1})\|^2,$$

576 from which we cannot guarantee that the right-hand-side of the inequality is nonpositive.

## 577 **D.2.2 Explicit Euler scheme**

578 Now, we turn to the explicit Euler scheme with the initial  $x_0$  and  $v_0 = 0$ , as

$$\begin{cases} x_{k+1} - x_k = \sqrt{s}v_k \\ v_{k+1} - v_k = -\frac{3}{k}v_k - \sqrt{s}\nabla f(x_k). \end{cases} \quad (\text{D.13})$$

579 **Technical analysis of explicit scheme (D.13)** Now, the Lyapunov function is

$$\mathcal{E}(k) = (k-2)(k-1)s (f(x_k) - f(x^*)) + \frac{1}{2} \|2(x_k - x^*) + (k-1)\sqrt{s}v_k\|^2.$$

580 Then we can calculate the iterate difference as

$$\begin{aligned} & \mathcal{E}(k+1) - \mathcal{E}(k) \\ &= (k-1)ks (f(x_{k+1}) - f(x_k)) + 2(k-1)s (f(x_k) - f(x^*)) \\ & \quad + \frac{1}{2} \langle 2(x_{k+1} - x_k) + k\sqrt{s}v_{k+1} - (k-1)\sqrt{s}v_k, \\ & \quad 2(x_{k+1} + x_k - 2x^*) + k\sqrt{s}v_{k+1} + (k-1)\sqrt{s}v_k \rangle \\ & \quad (k-1)ks (f(x_{k+1}) - f(x_k)) + 2(k-1)s (f(x_k) - f(x^*)) \\ & \quad + \langle -ks\nabla f(x_k), 2(x_k - x^*) + (k-1)\sqrt{s}v_k \rangle + \frac{1}{2} k^2 s^2 \|\nabla f(x_k)\|^2. \end{aligned}$$

581 • If we take the following basic inequality for  $f \in \mathcal{F}_L^1(\mathbb{R}^n)$

$$\begin{cases} f(x_{k+1}) - f(x_k) \leq \langle \nabla f(x_k), x_{k+1} - x_k \rangle + \frac{L}{2} \|x_{k+1} - x_k\|^2 \\ f(x_k) - f(x^*) \leq \langle \nabla f(x_k), x_k - x^* \rangle - \frac{1}{2L} \|\nabla f(x_k)\|^2, \end{cases}$$



582

we obtain the following estimate:

$$\begin{aligned} \mathcal{E}(k+1) - \mathcal{E}(k) &\leq \frac{k(k-1)Ls}{2} \|x_{k+1} - x_k\|^2 \\ &\quad - 2s(f(x_k) - f(x^*)) - \frac{ks}{L} \|\nabla f(x_k)\|^2 + \frac{k^2 s^2}{2} \|\nabla f(x_k)\|^2, \end{aligned}$$

583

from which we cannot guarantee that the right-hand-side of the inequality is nonpositive.

584

- If we take the following basic inequality for  $f \in \mathcal{F}_L^1(\mathbb{R}^n)$

$$\begin{cases} f(x_{k+1}) - f(x_k) \leq \langle \nabla f(x_{k+1}), x_{k+1} - x_k \rangle - \frac{1}{2L} \|\nabla f(x_{k+1}) - \nabla f(x_k)\|^2 \\ f(x_k) - f(x^*) \leq \langle \nabla f(x_k), x_k - x^* \rangle - \frac{1}{2L} \|\nabla f(x_k)\|^2, \end{cases}$$

585

we obtain the following estimate:

$$\begin{aligned} \mathcal{E}(k+1) - \mathcal{E}(k) &\leq (k-1)ks \left( \langle \nabla f(x_{k+1}) - \nabla f(x_k), x_{k+1} - x_k \rangle - \frac{1}{2L} \|\nabla f(x_{k+1}) - \nabla f(x_k)\|^2 \right) \\ &\quad - 2s(f(x_k) - f(x^*)) - \frac{ks}{L} \|\nabla f(x_k)\|^2 + \frac{k^2 s^2}{2} \|\nabla f(x_k)\|^2, \end{aligned}$$

586

from which we still cannot guarantee that the right-hand-side of the inequality is nonpositive.

### 587 D.2.3 Implicit scheme

588 Finally, we analyze the implicit Euler scheme with the initial  $x_0$  and  $v_0 = 0$ :

$$\begin{cases} x_{k+1} - x_k = \sqrt{s}v_{k+1} \\ v_{k+1} - v_k = -\frac{3}{k+1}v_{k+1} - \sqrt{s}\nabla f(x_{k+1}) \end{cases} \quad (\text{D.14})$$

589 **Technical analysis of implicit scheme (D.14)** We construct the Lyapunov function as

$$\mathcal{E}(k) = (k+1)(k+2)s(f(x_k) - f(x^*)) + \frac{1}{2} \|2(x_k - x^*) + (k+1)\sqrt{s}v_k\|^2.$$

590 Then we can calculate the iterate difference as

$$\begin{aligned} \mathcal{E}(k+1) - \mathcal{E}(k) &= (k+1)(k+2)s(f(x_{k+1}) - f(x_k)) + 2(k+2)s(f(x_{k+1}) - f(x^*)) \\ &\quad + \frac{1}{2} \langle 2(x_{k+1} - x_k) + (k+2)\sqrt{s}v_{k+1} - (k+1)\sqrt{s}v_k, \\ &\quad 2(x_{k+1} + x_k - 2x^*) + (k+2)\sqrt{s}v_{k+1} + (k+1)\sqrt{s}v_k \rangle \\ &= (k+1)(k+2)s(f(x_{k+1}) - f(x_k)) + 2(k+2)s(f(x_{k+1}) - f(x^*)) \\ &\quad - \langle (k+1)s\nabla f(x_{k+1}), 2(x_{k+1} - x^*) + (k+2)\sqrt{s}v_{k+1} \rangle \\ &\quad - \frac{1}{2}(k+1)^2 s^2 \|\nabla f(x_{k+1})\|^2. \end{aligned}$$

591 Now, we hope to utilize the basic inequality for  $f \in \mathcal{F}_L^1(\mathbb{R}^n)$  to make the right side of equality no  
592 more than zero. Based on the following inequalities:

$$\begin{cases} f(x_{k+1}) - f(x_k) \leq \langle \nabla f(x_{k+1}), x_{k+1} - x_k \rangle \\ f(x_{k+1}) - f(x^*) \leq \langle \nabla f(x_{k+1}), x_{k+1} - x^* \rangle - \frac{1}{2L} \|\nabla f(x_{k+1})\|^2, \end{cases}$$

593 we obtain:

$$\mathcal{E}(k+1) - \mathcal{E}(k) \leq 2s(f(x_{k+1}) - f(x^*)) - \frac{(k+1)s}{L} \|\nabla f(x_{k+1})\|^2 - \frac{1}{2}(k+1)s^2 \|\nabla f(x_{k+1})\|^2.$$

594

Although the negative term includes the multiplier  $k$  and  $k^2$ , we cannot guarantee that the right-hand-side of the inequality is nonpositive.

595

596 Here, in contrast to the subtle discrete construction in Su et al. [2016], we point out that the standard  
597 numerical discretization of low-resolution ODE (2.2) cannot maintain the convergence rate from the  
598 continuous-time ODE, due the presence of numerical error.
